# Supplementary material for: lncRNA CYTOR promotes aberrant glycolysis and mitochondrial respiration via HNRNPC-mediated ZEB1 stabilization in oral squamous cell carcinoma
Source: PubMed Central journal article supplement (PMC9376070; doi:10.1038/s41419-022-05157-1), 2022-08-13

Figure 1J

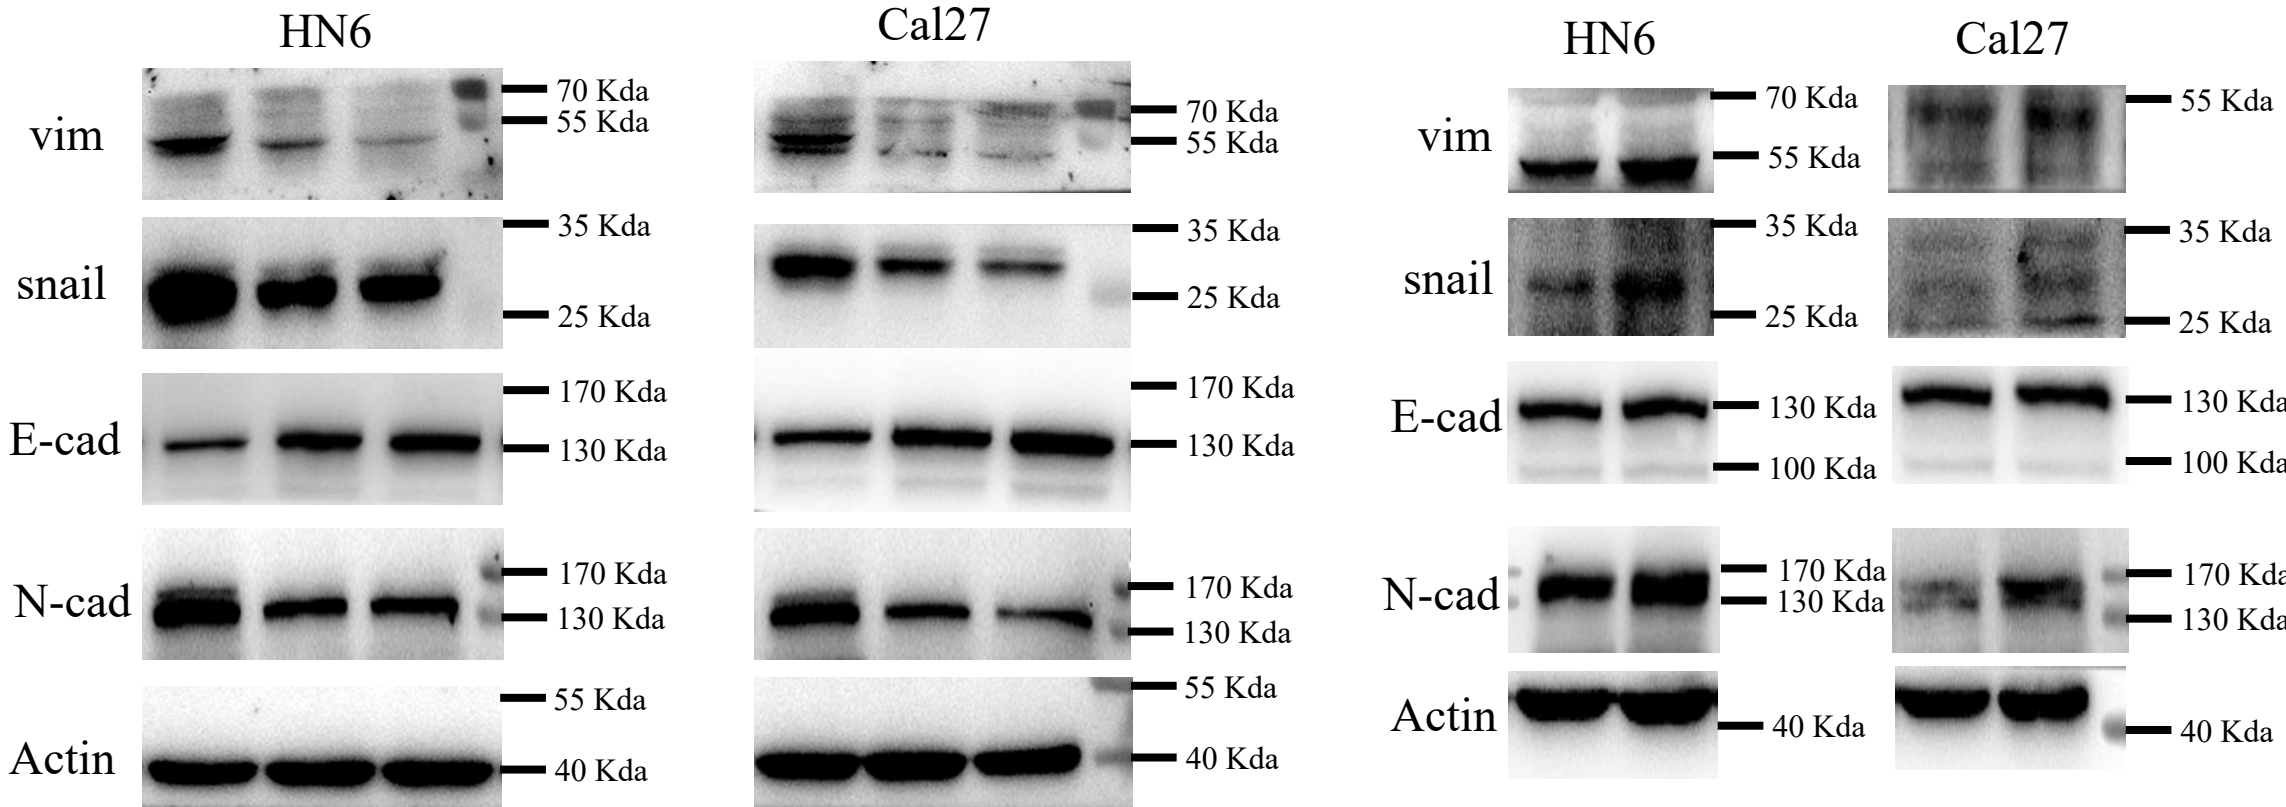

Figure 1K

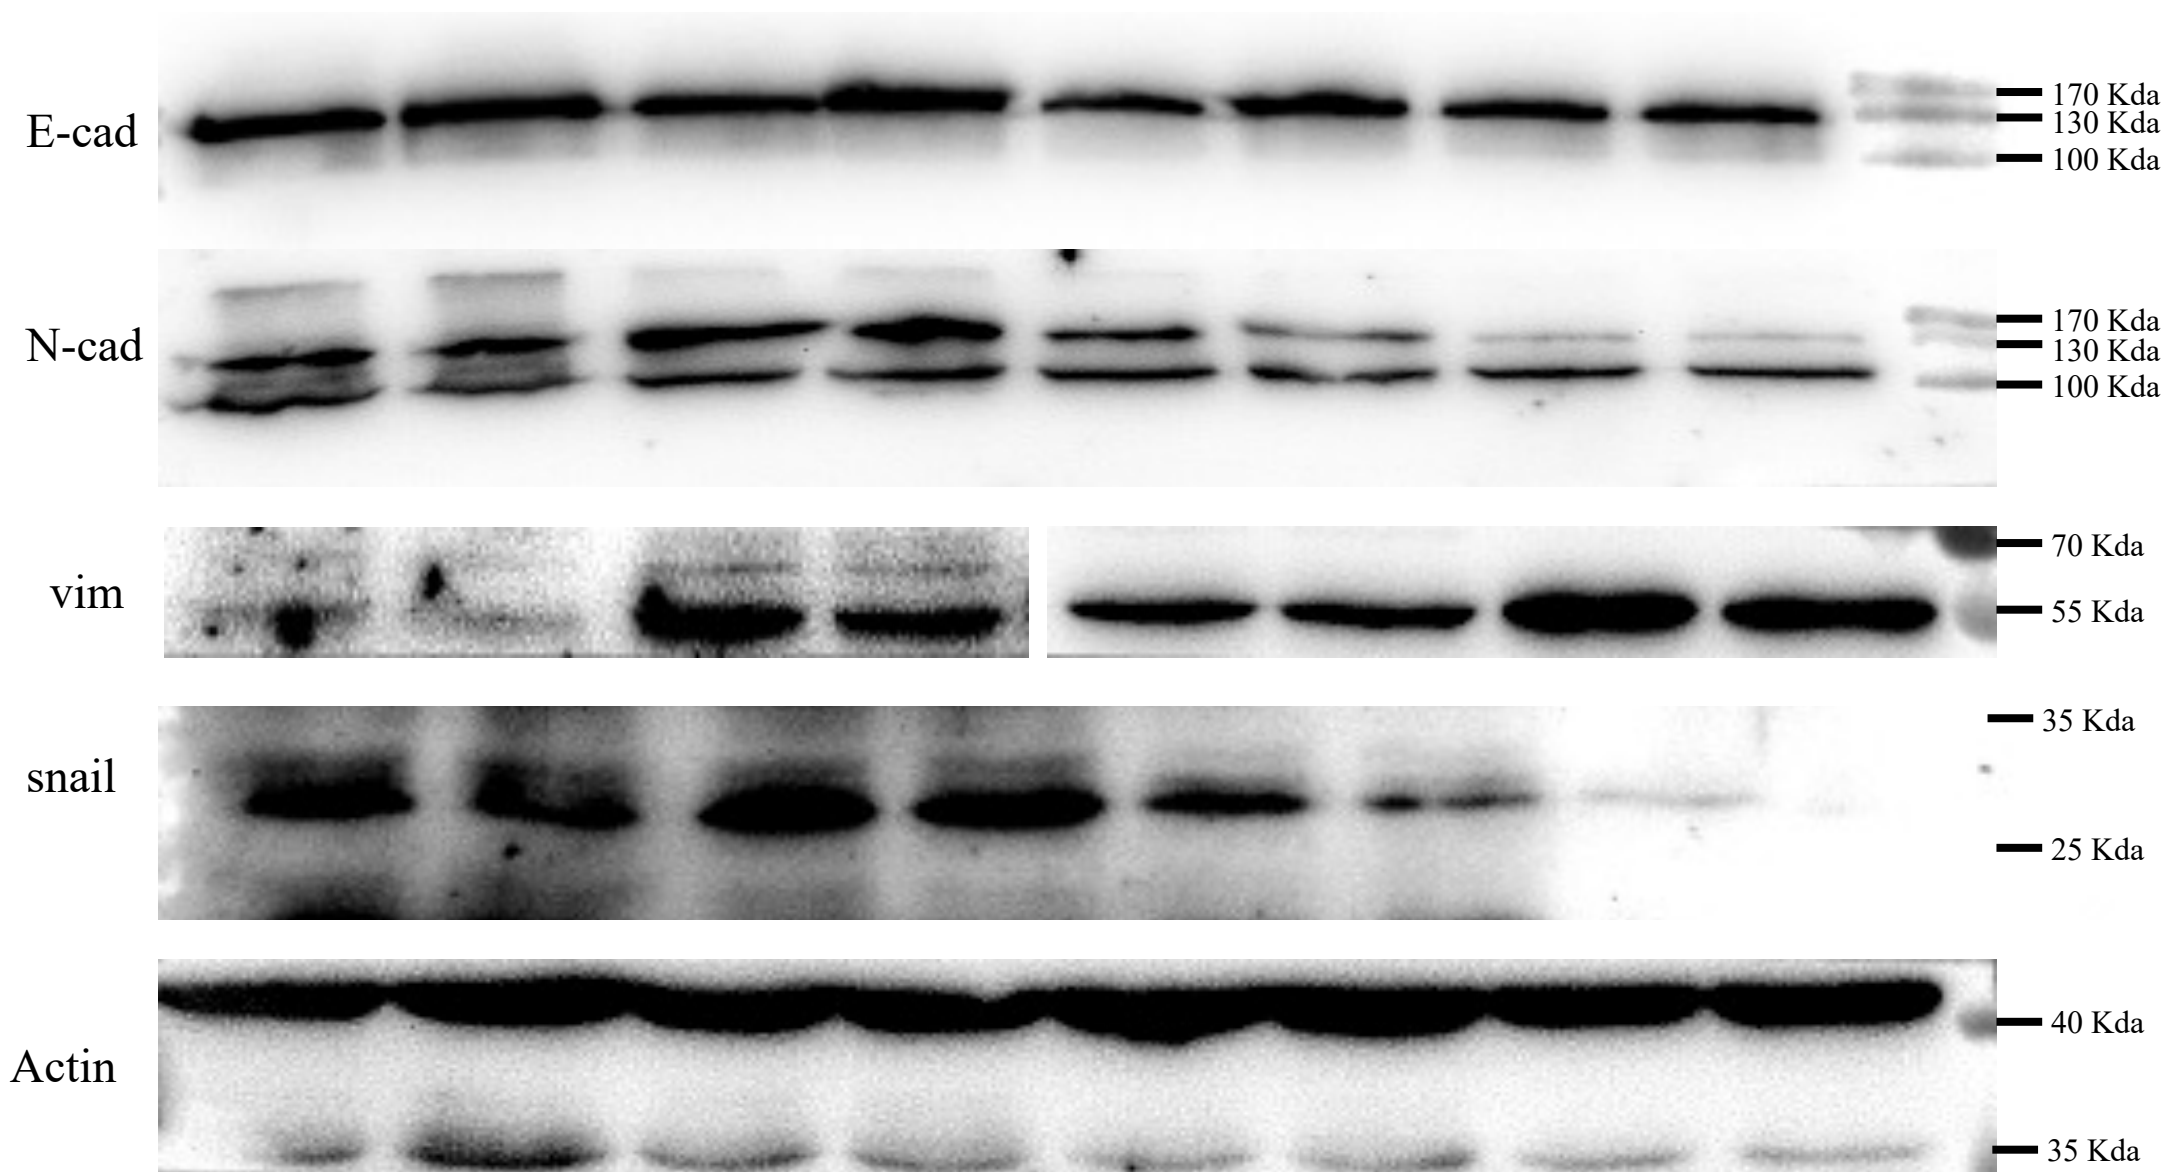

Figure 2C

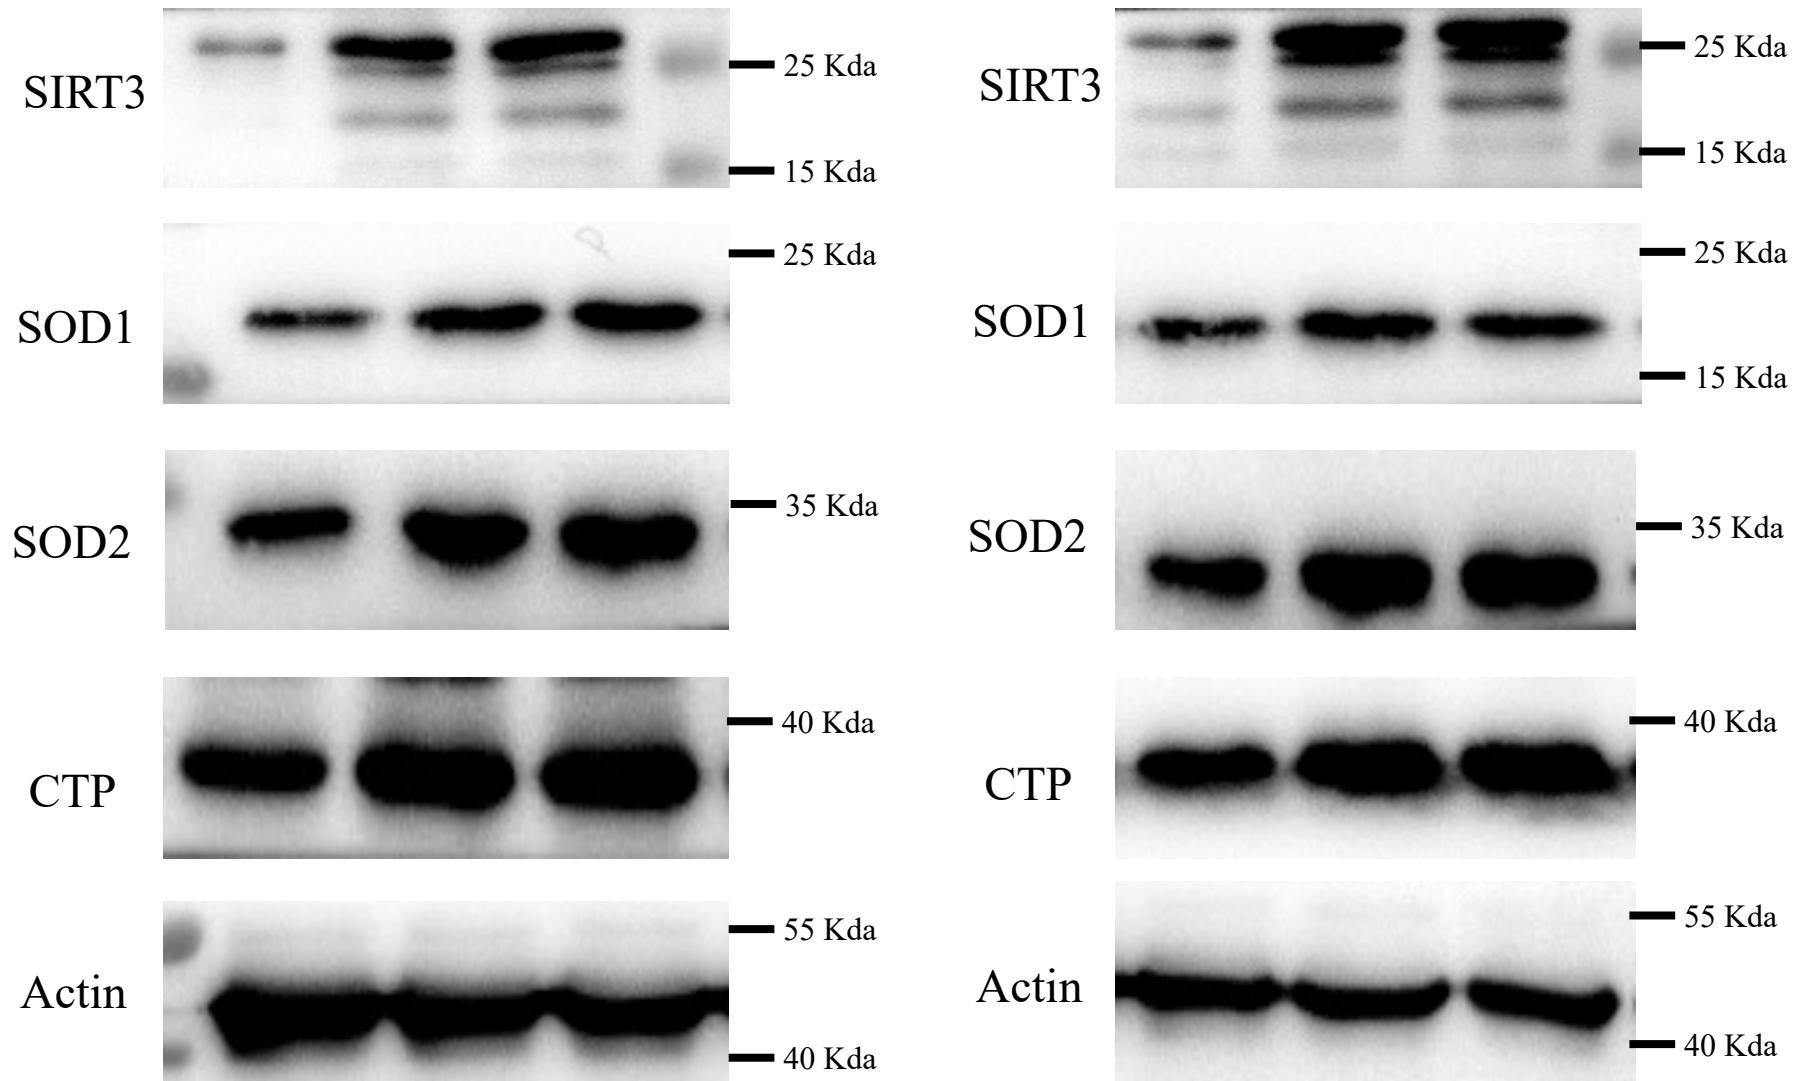

Figure 3B

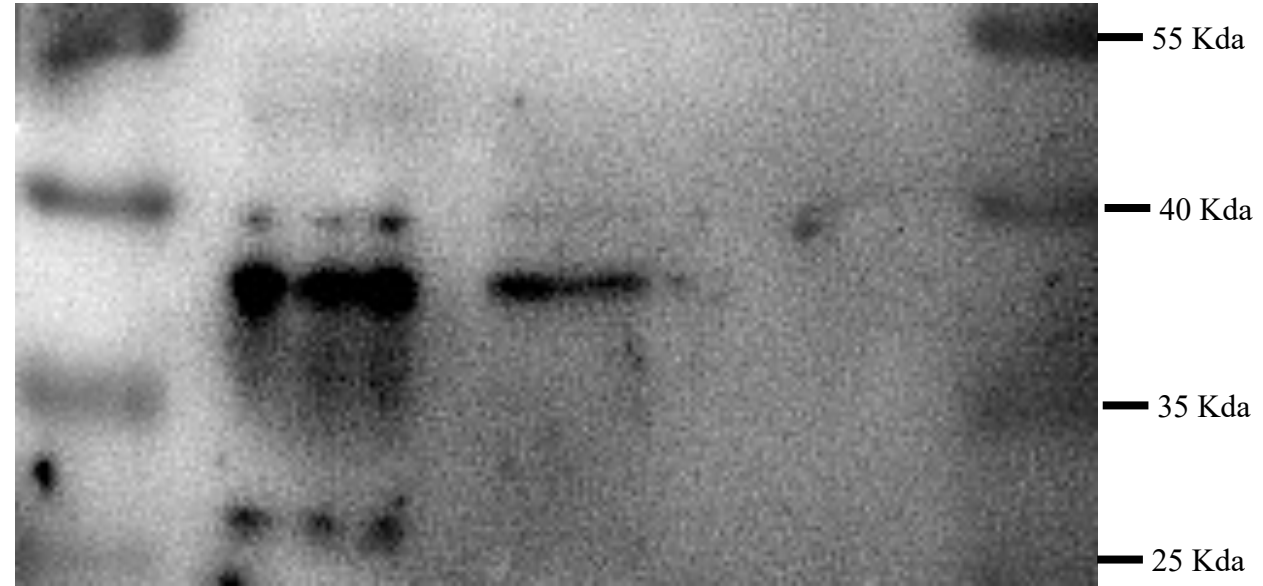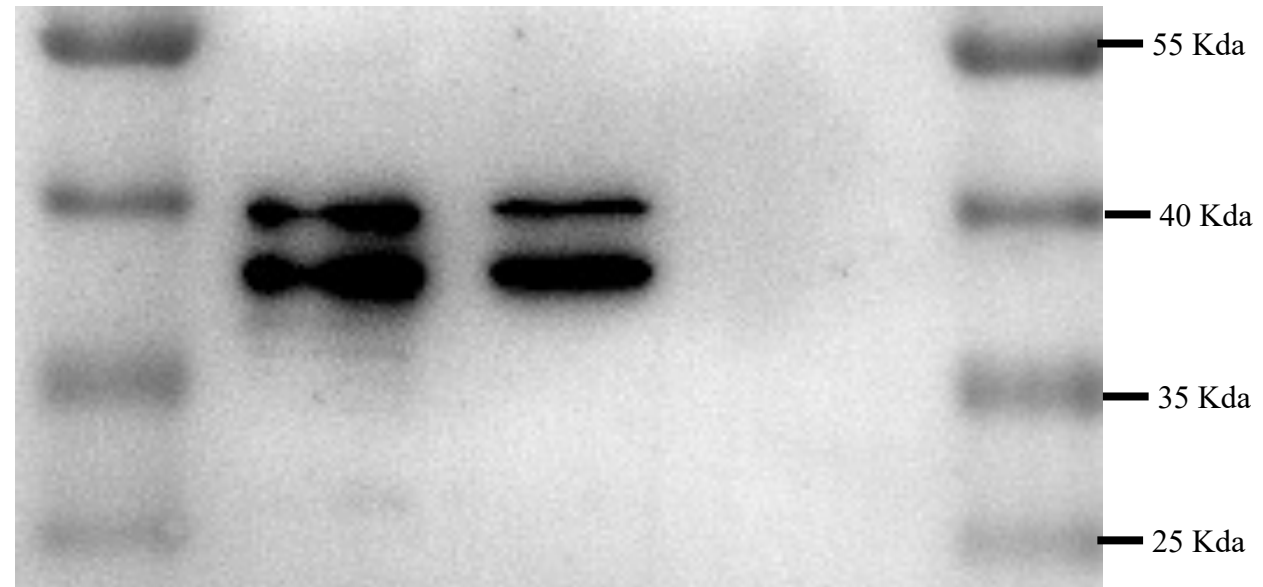

Figure 3E

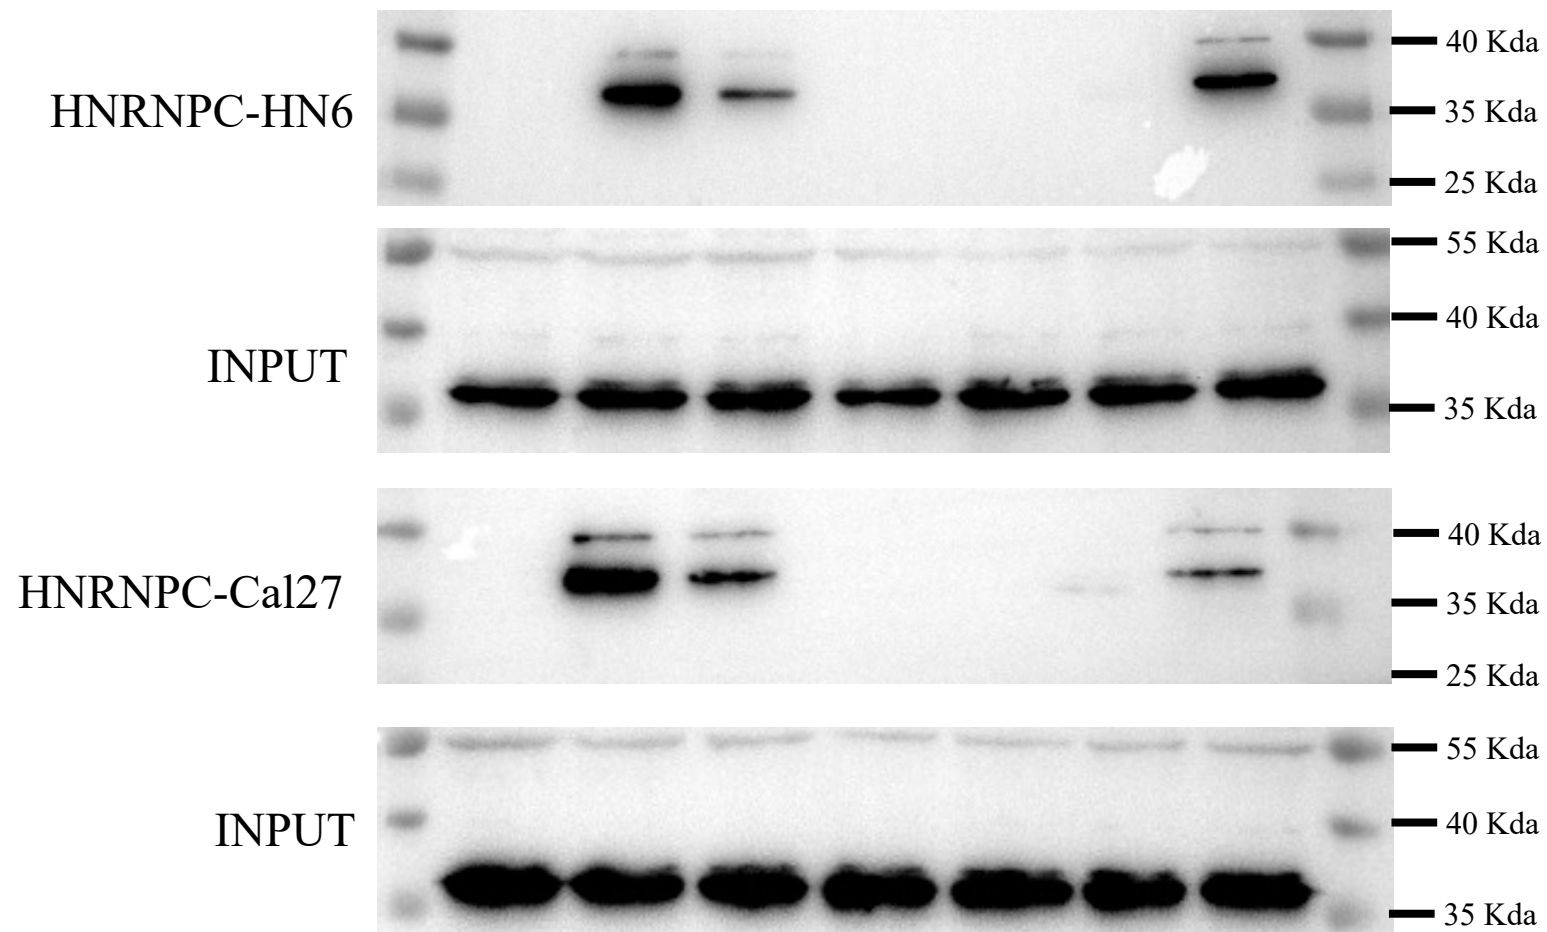

Figure 3F

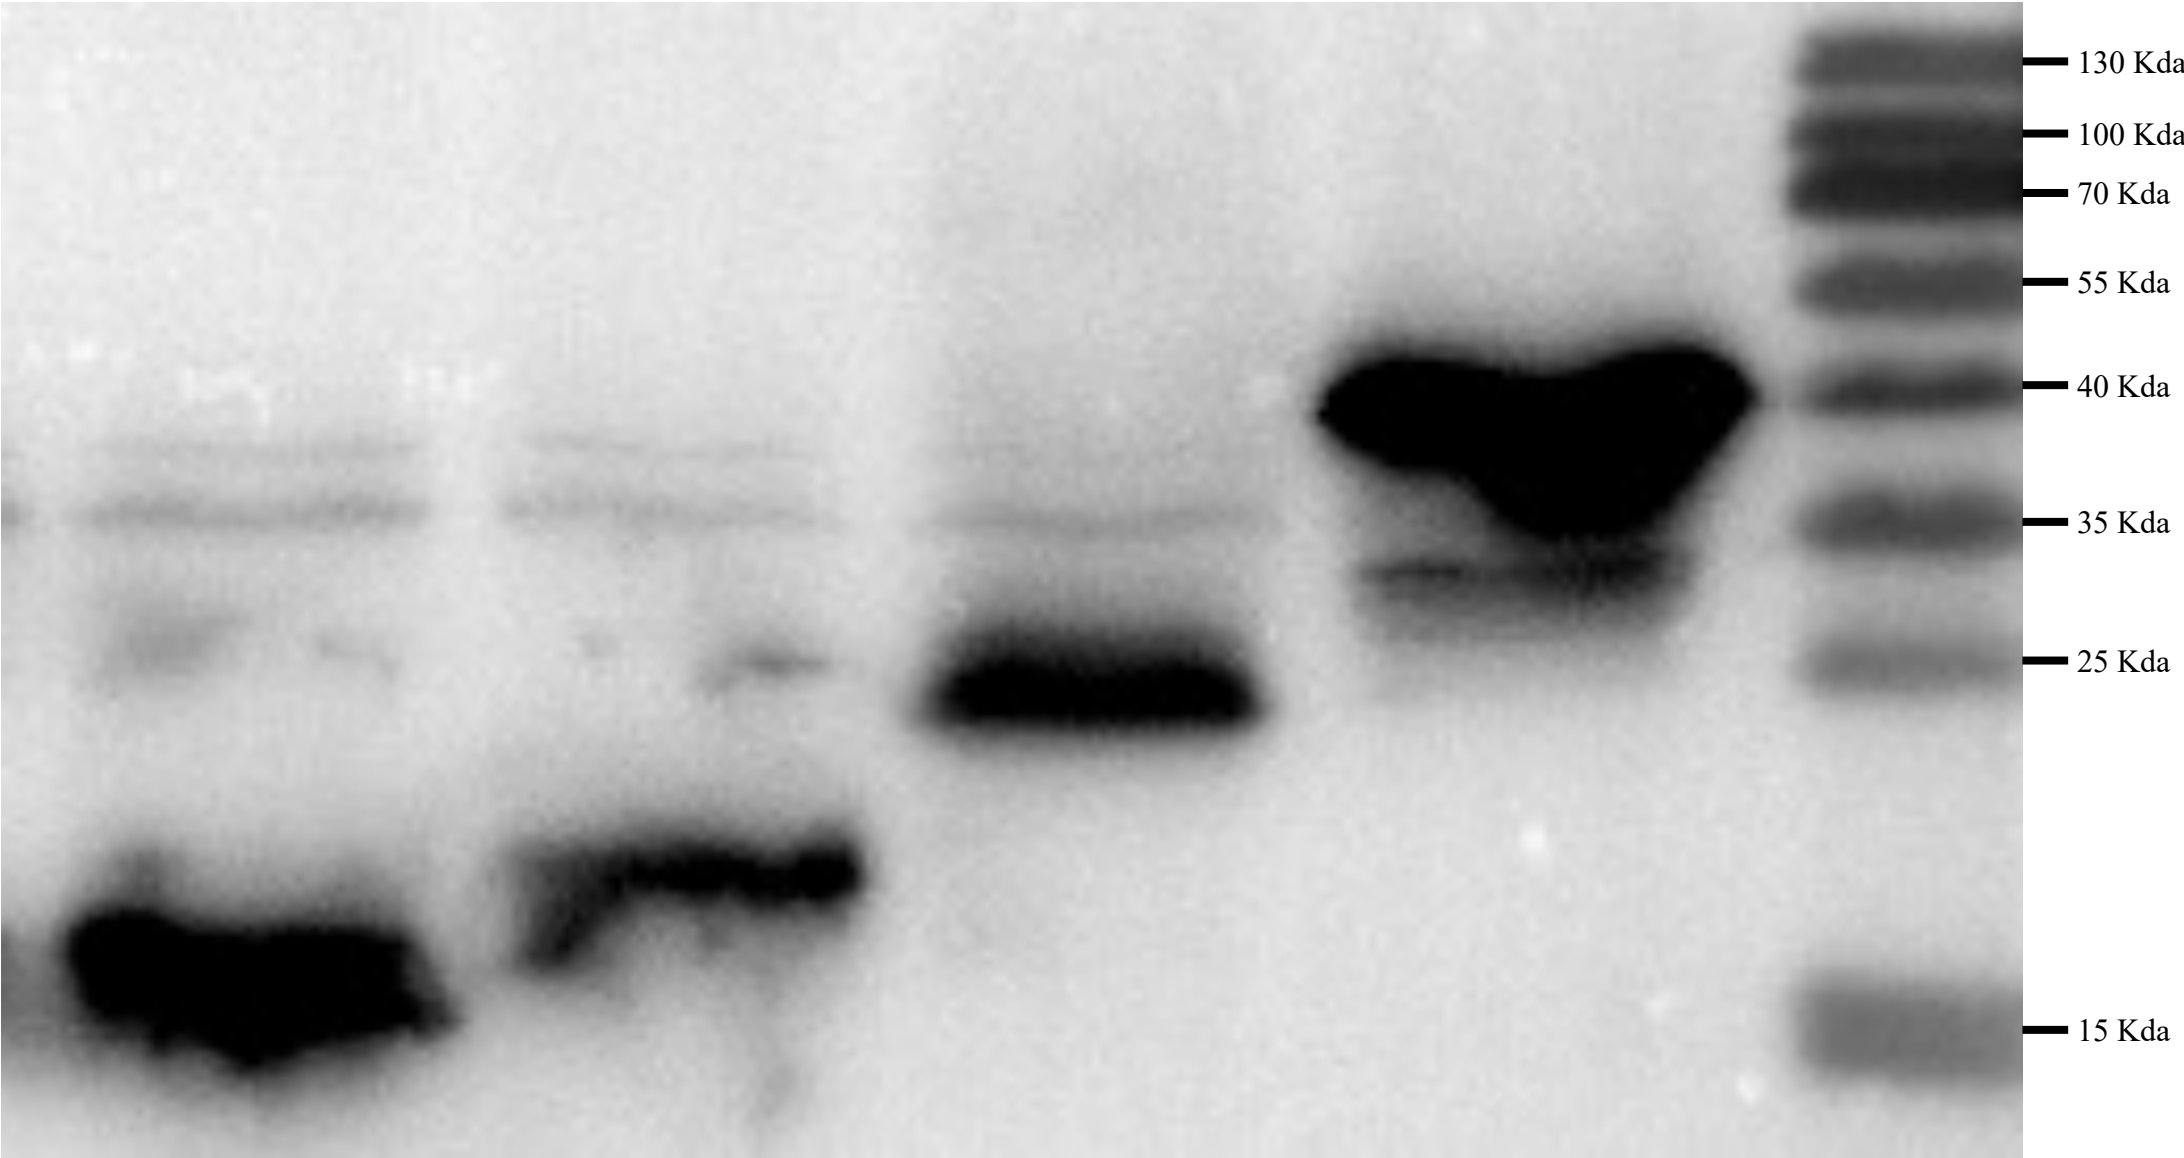

Figure 3I

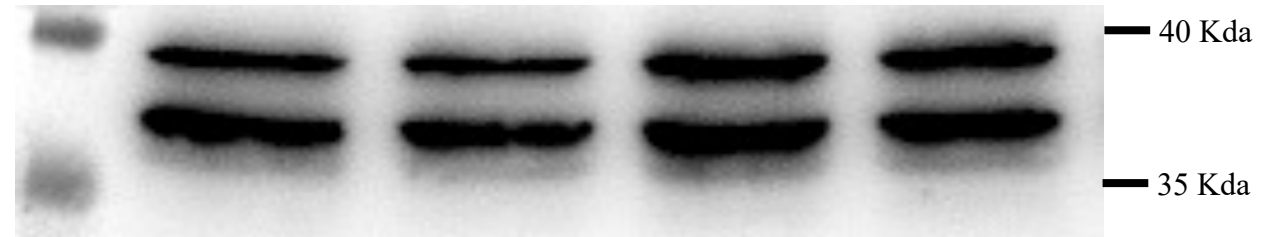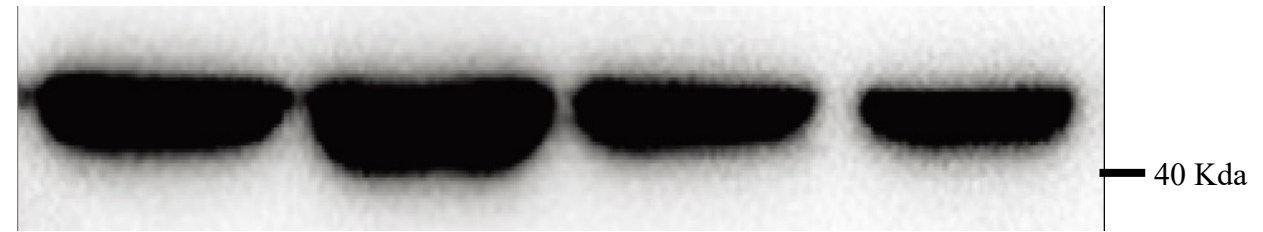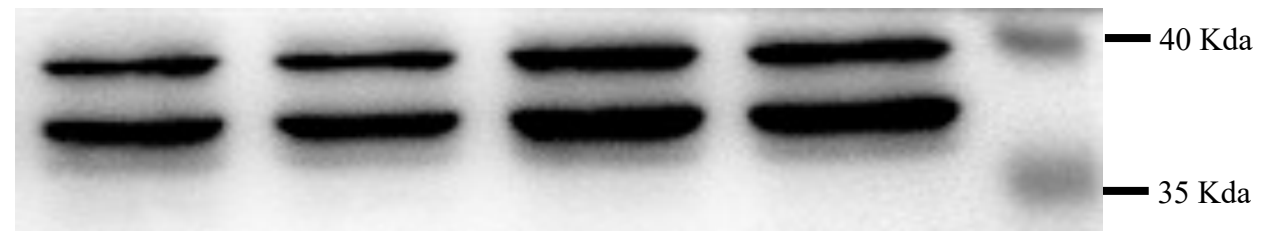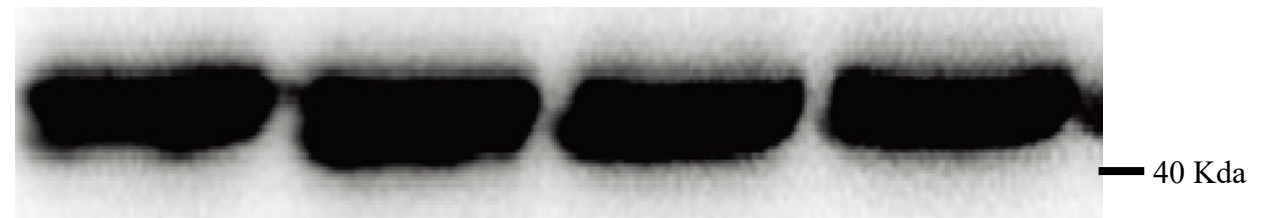

Figure 3K

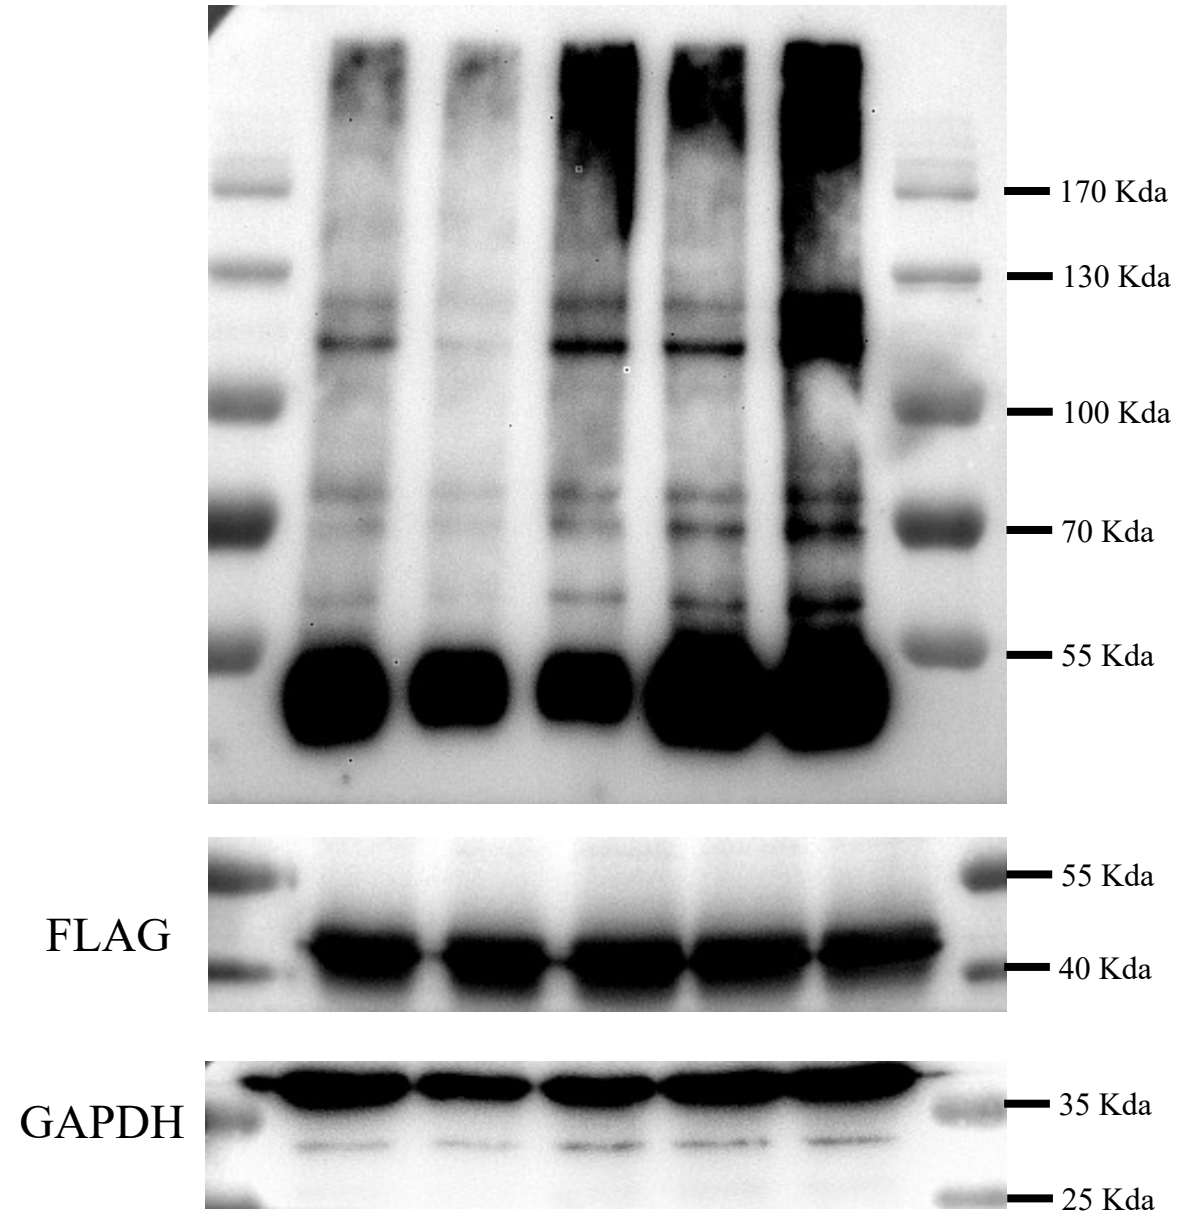



Figure 3L

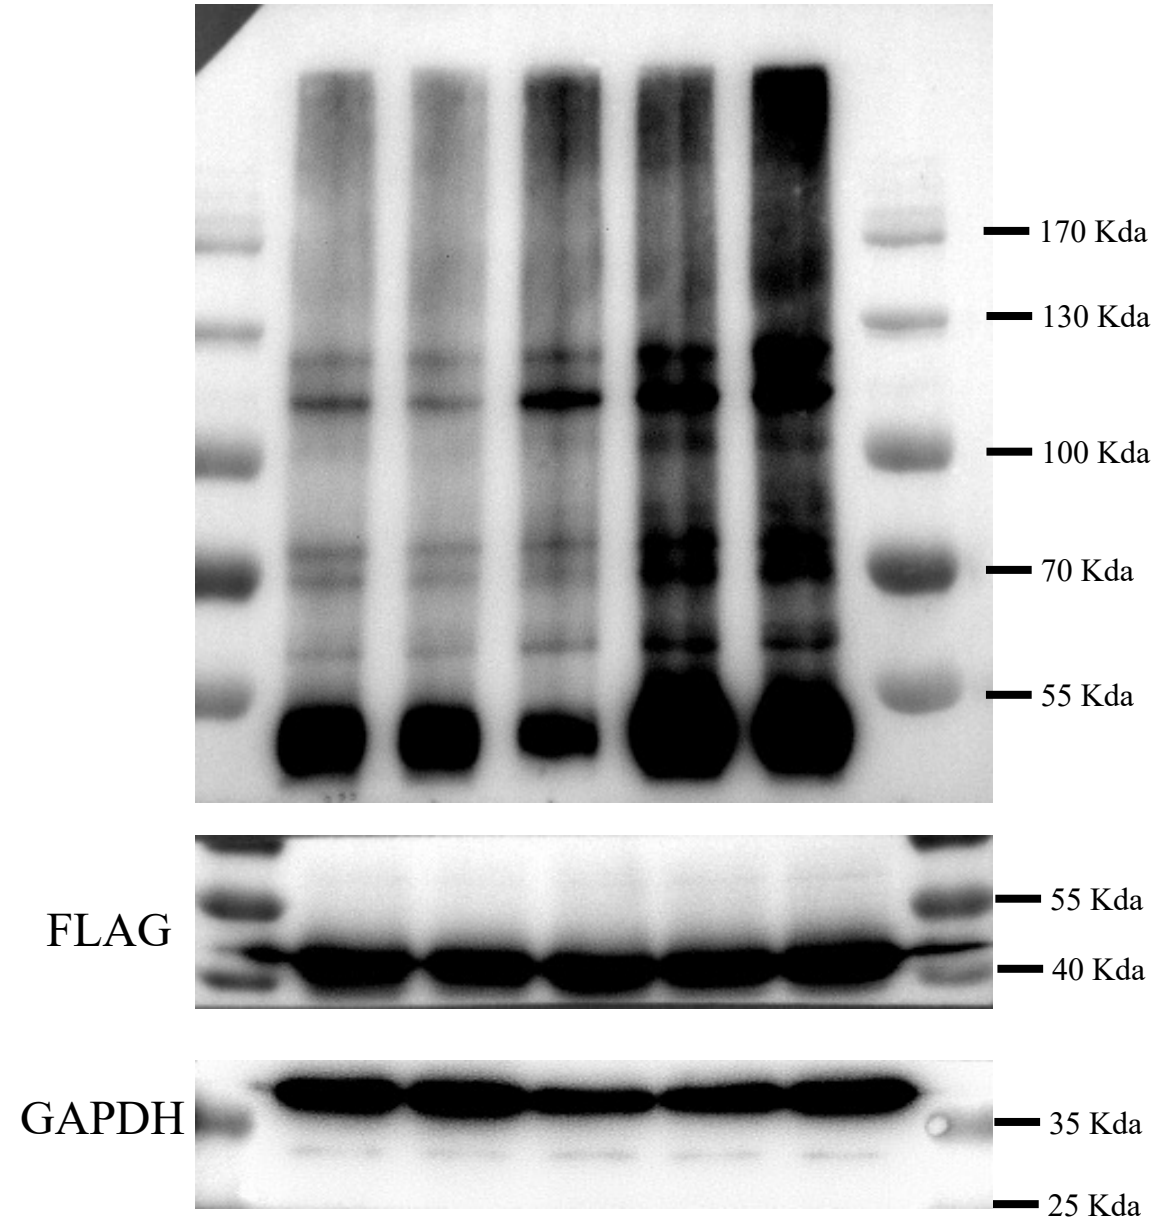

Figure 3M

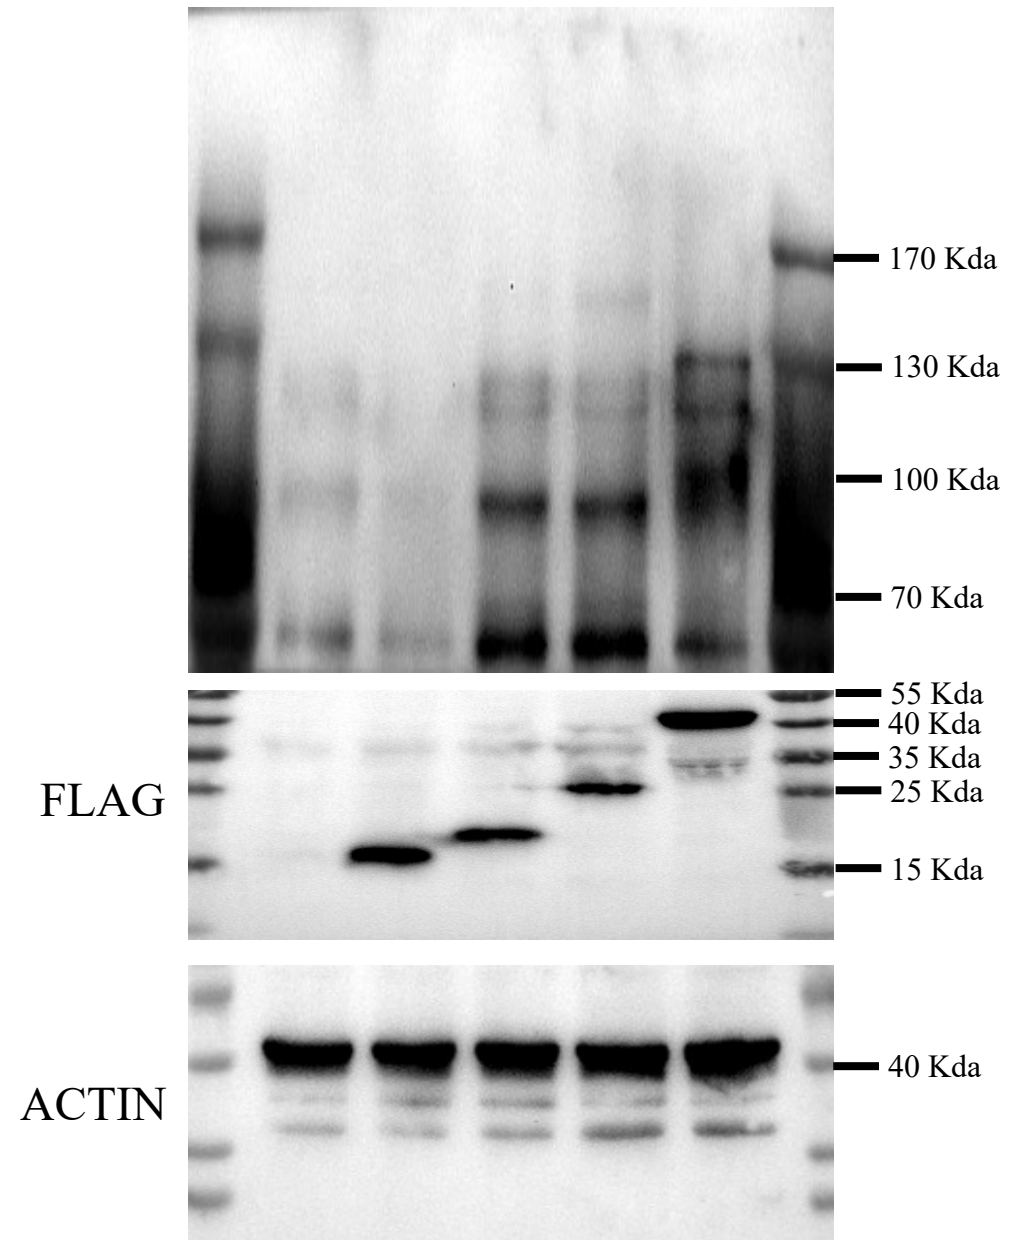

Figure 4B

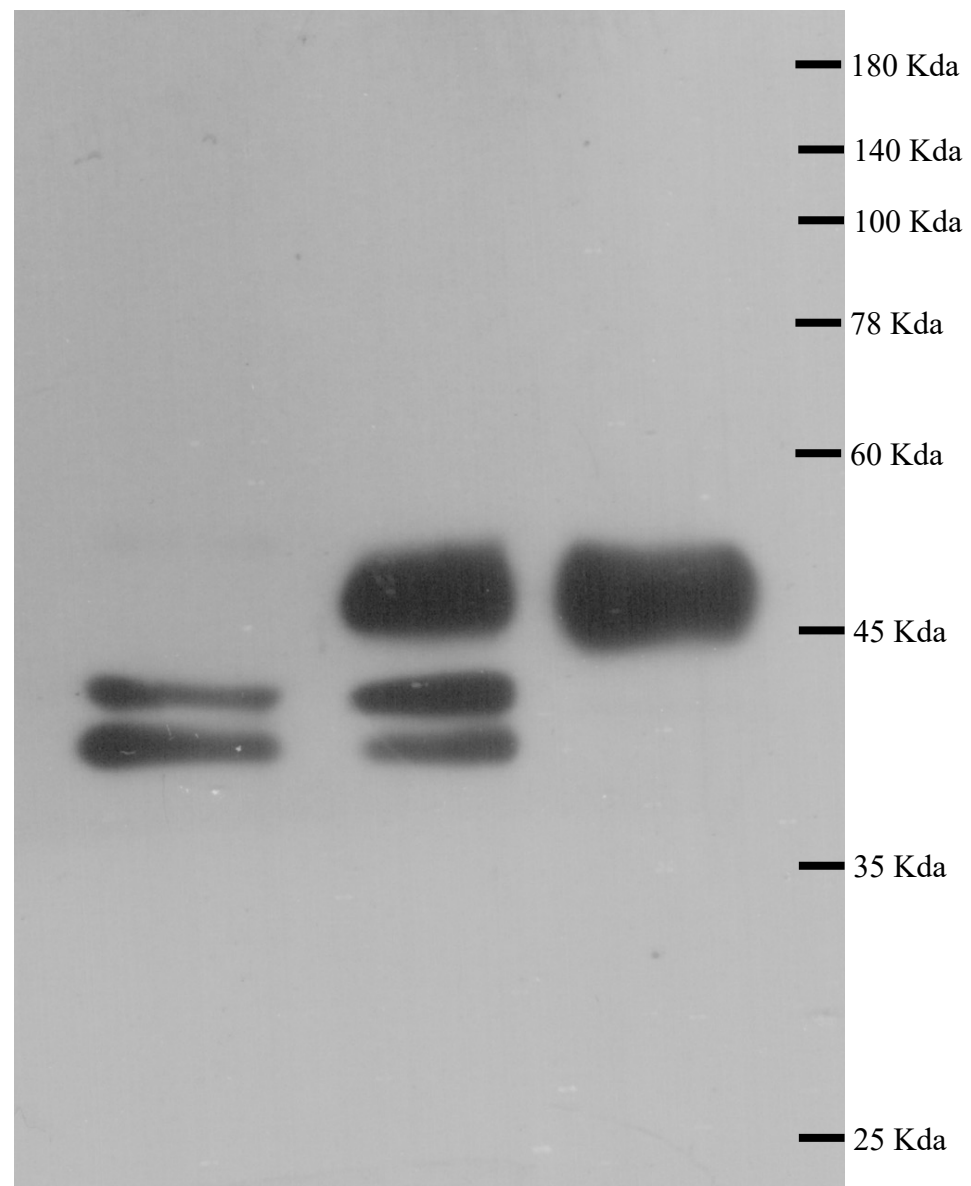

Figure 4E

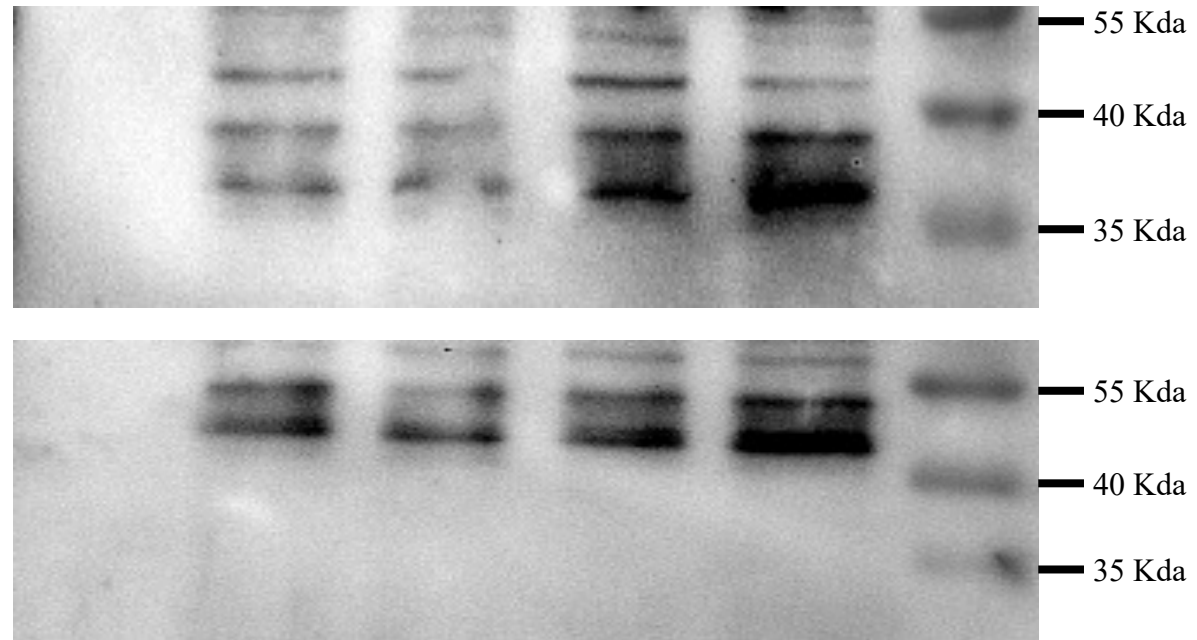

Figure 4F

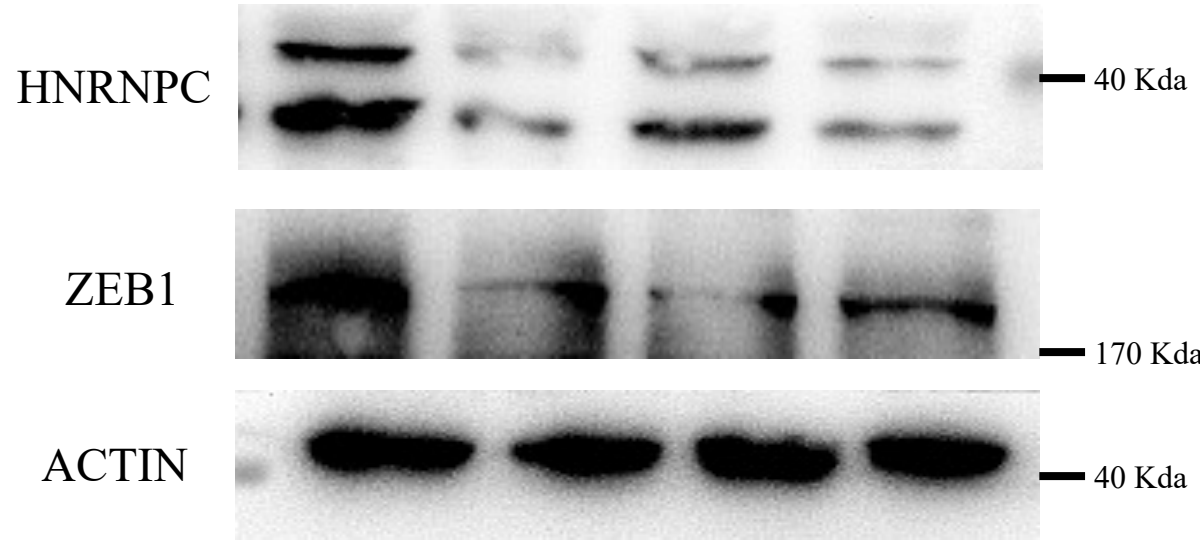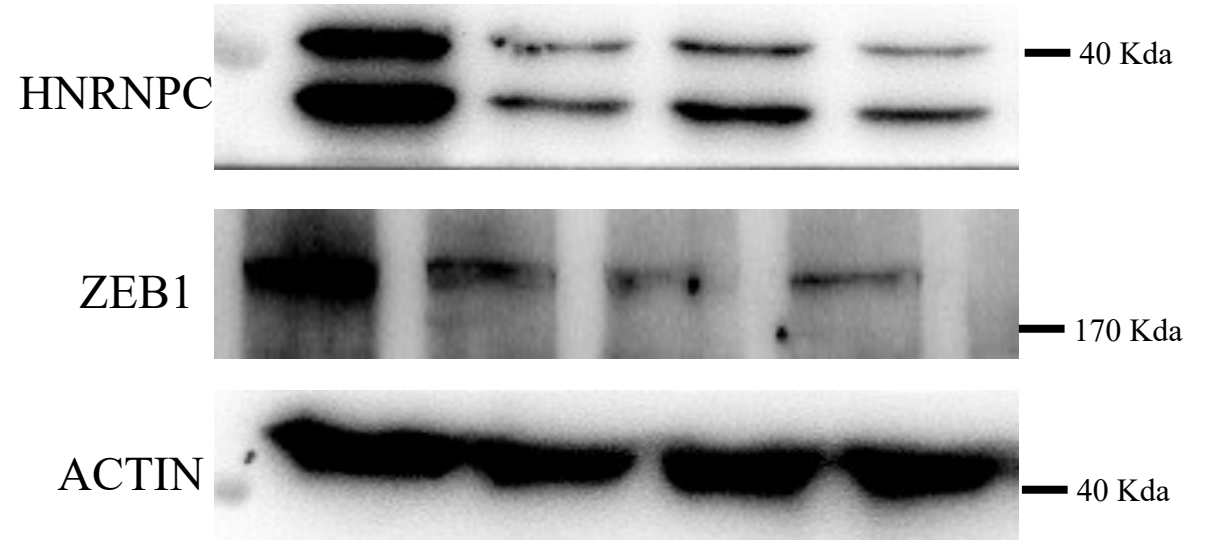

Figure 4G

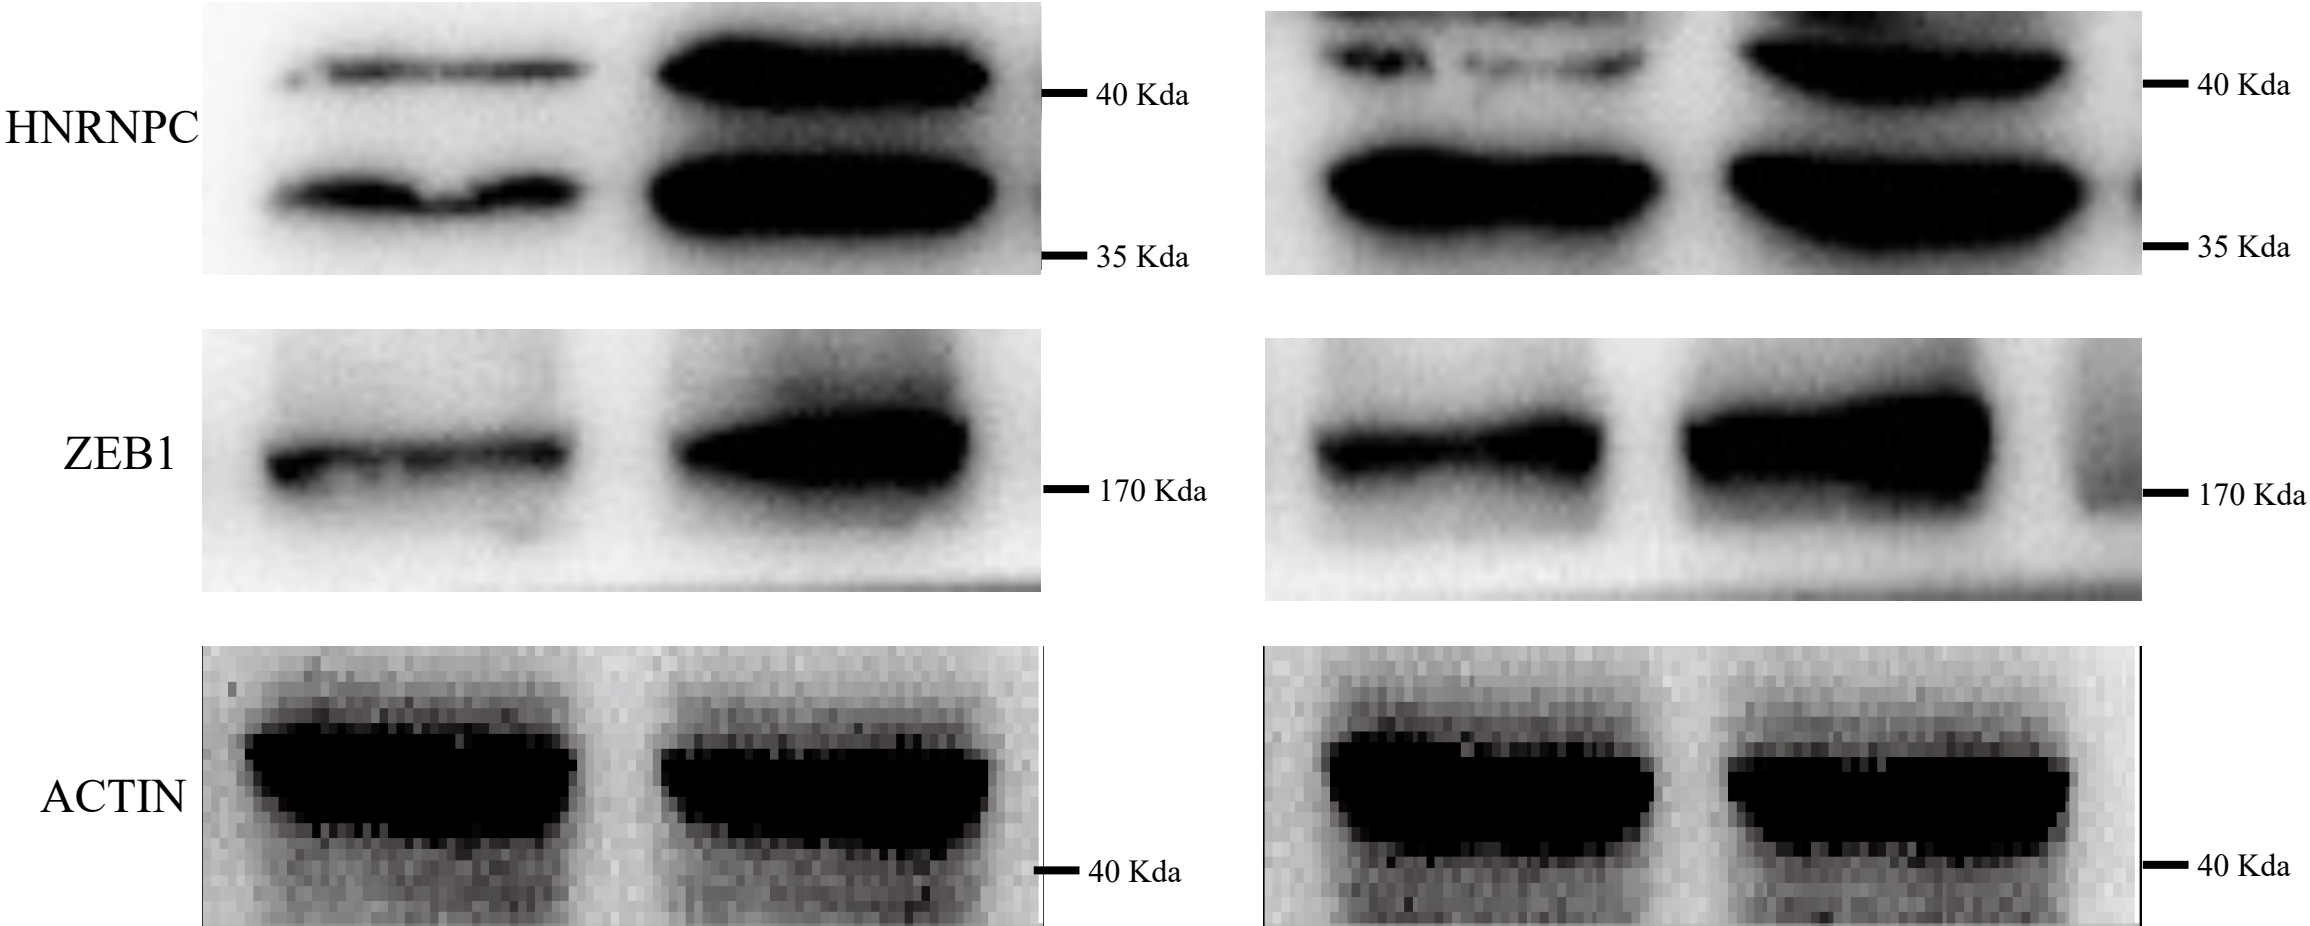

Figure 4I

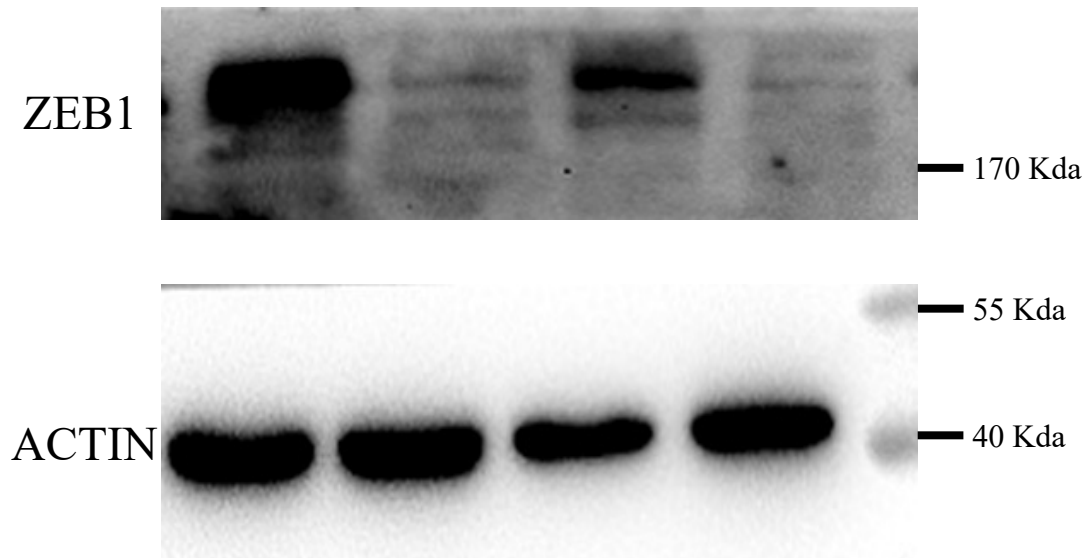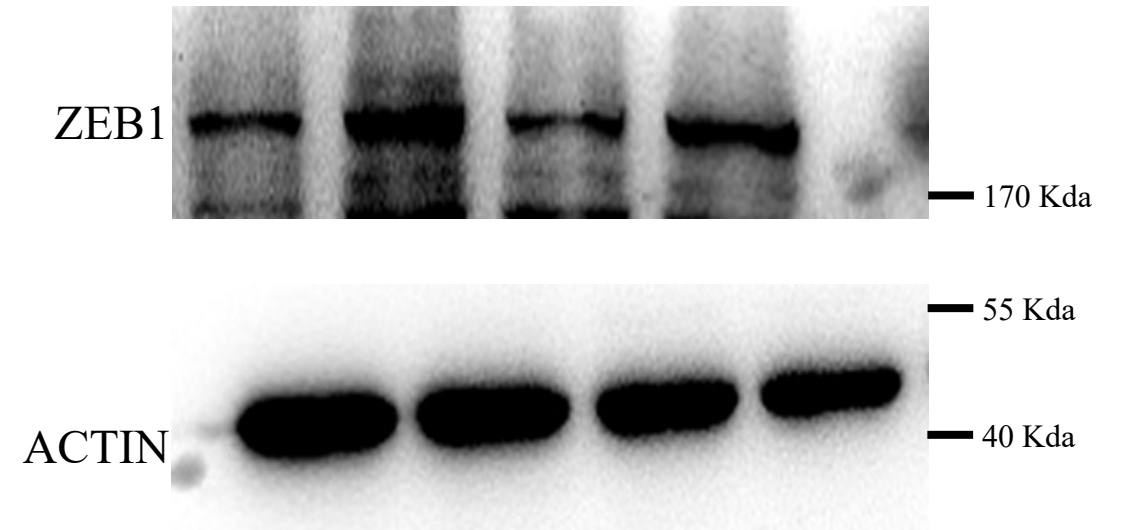

Figure 4J

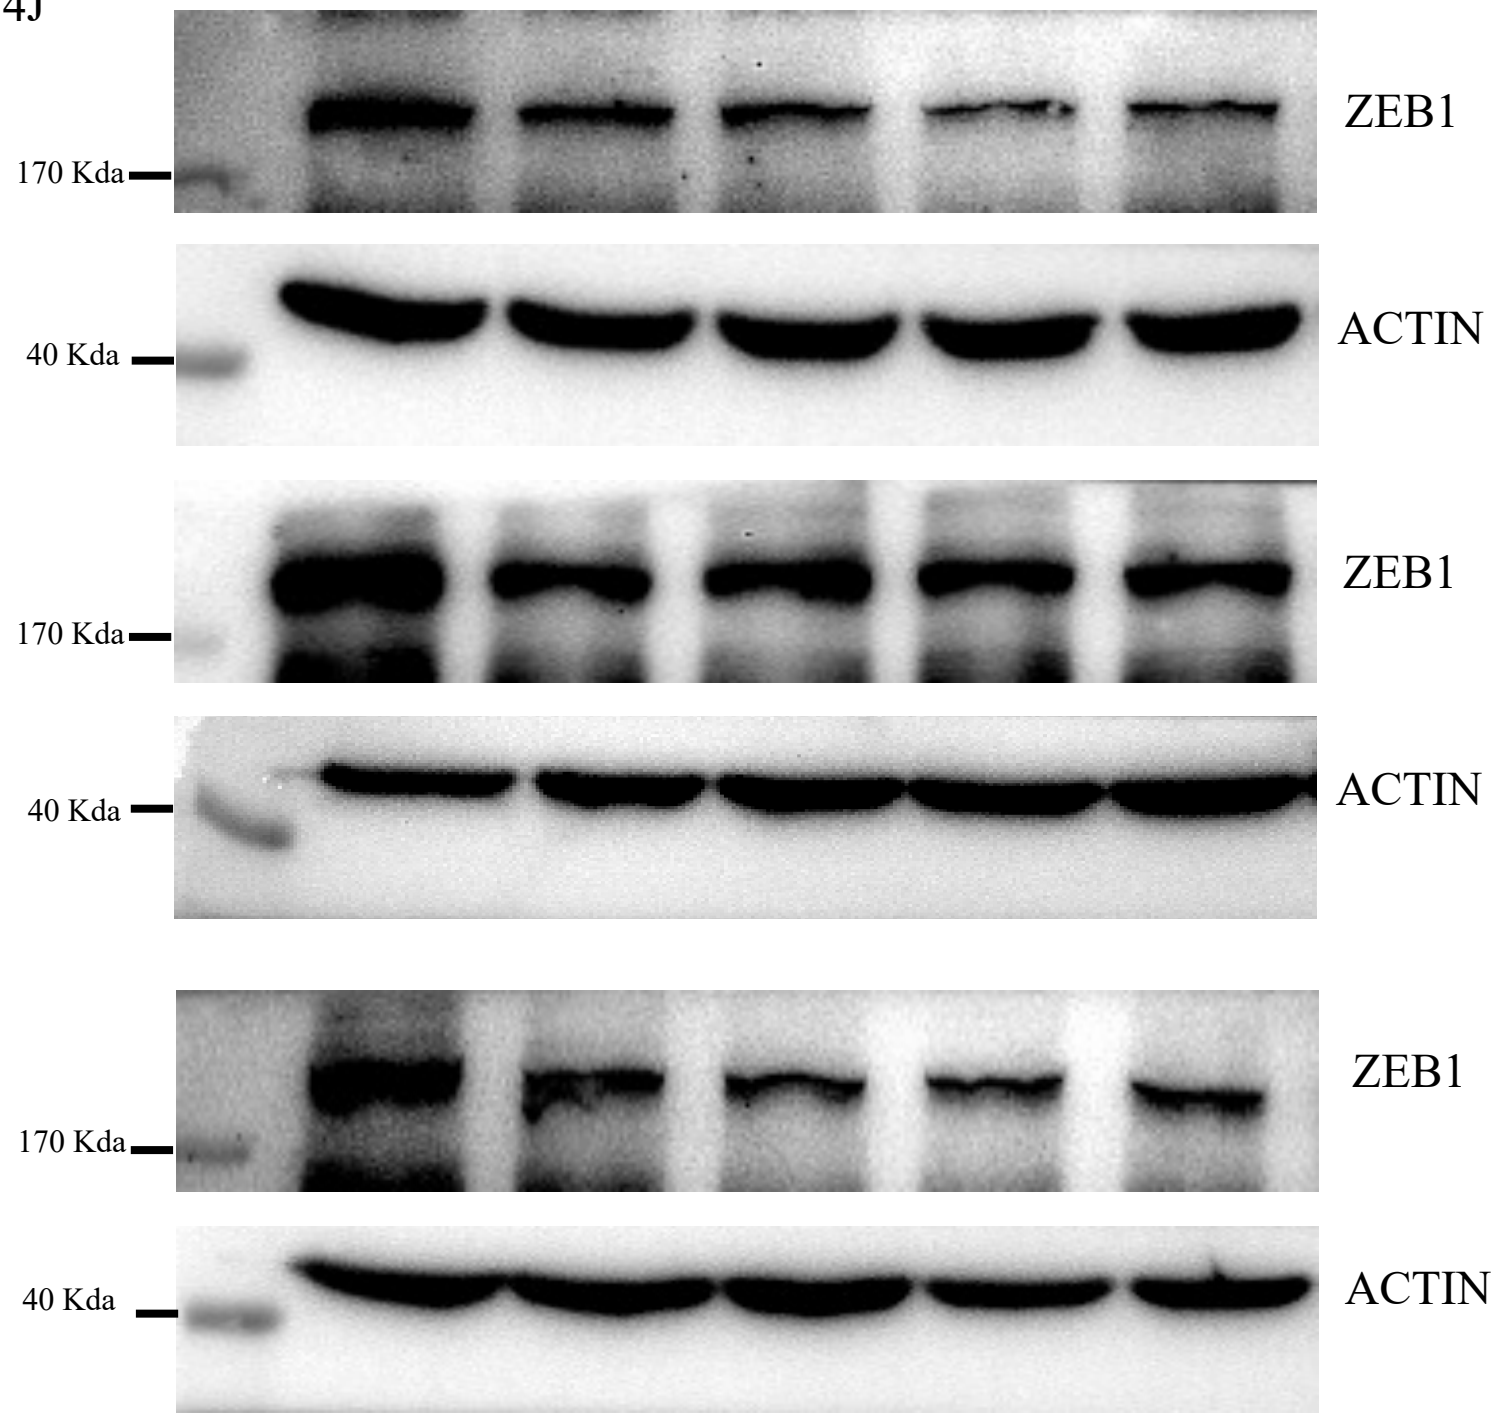



Figure 5F

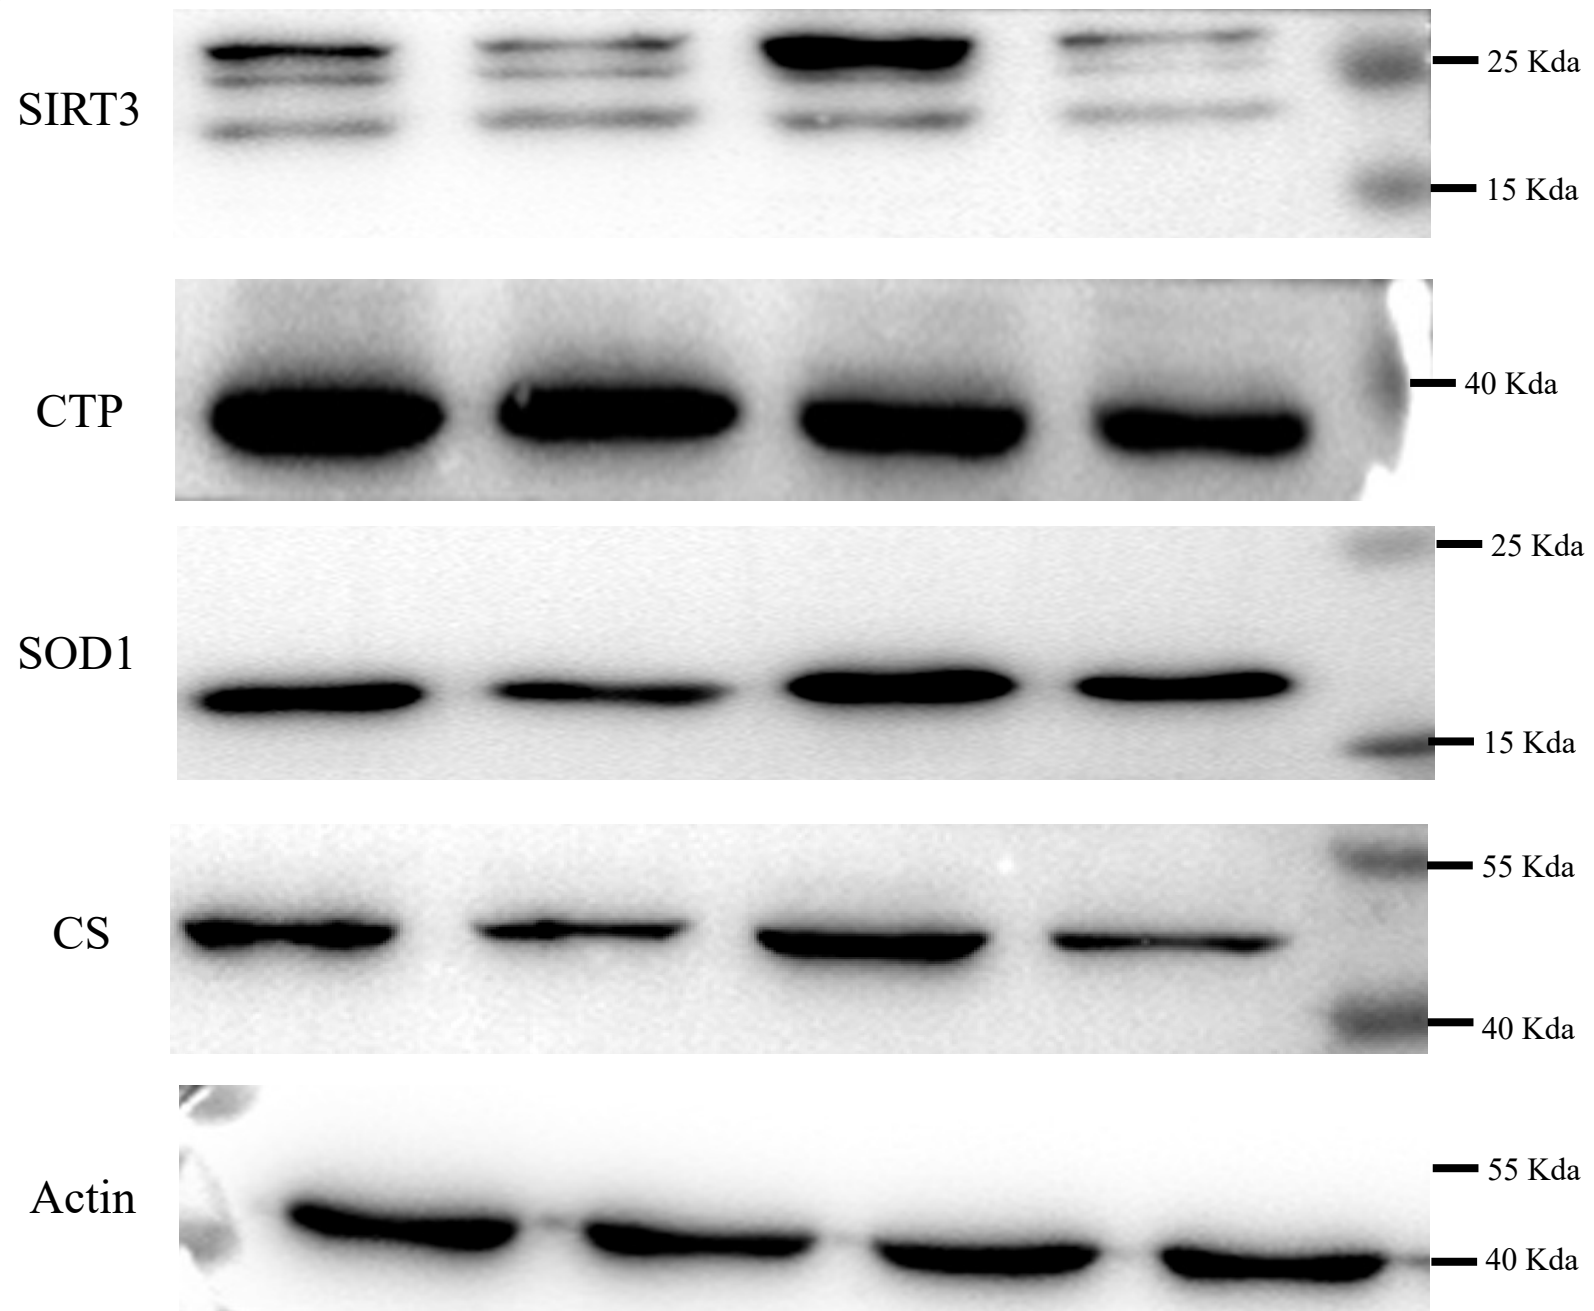

Figure 6B

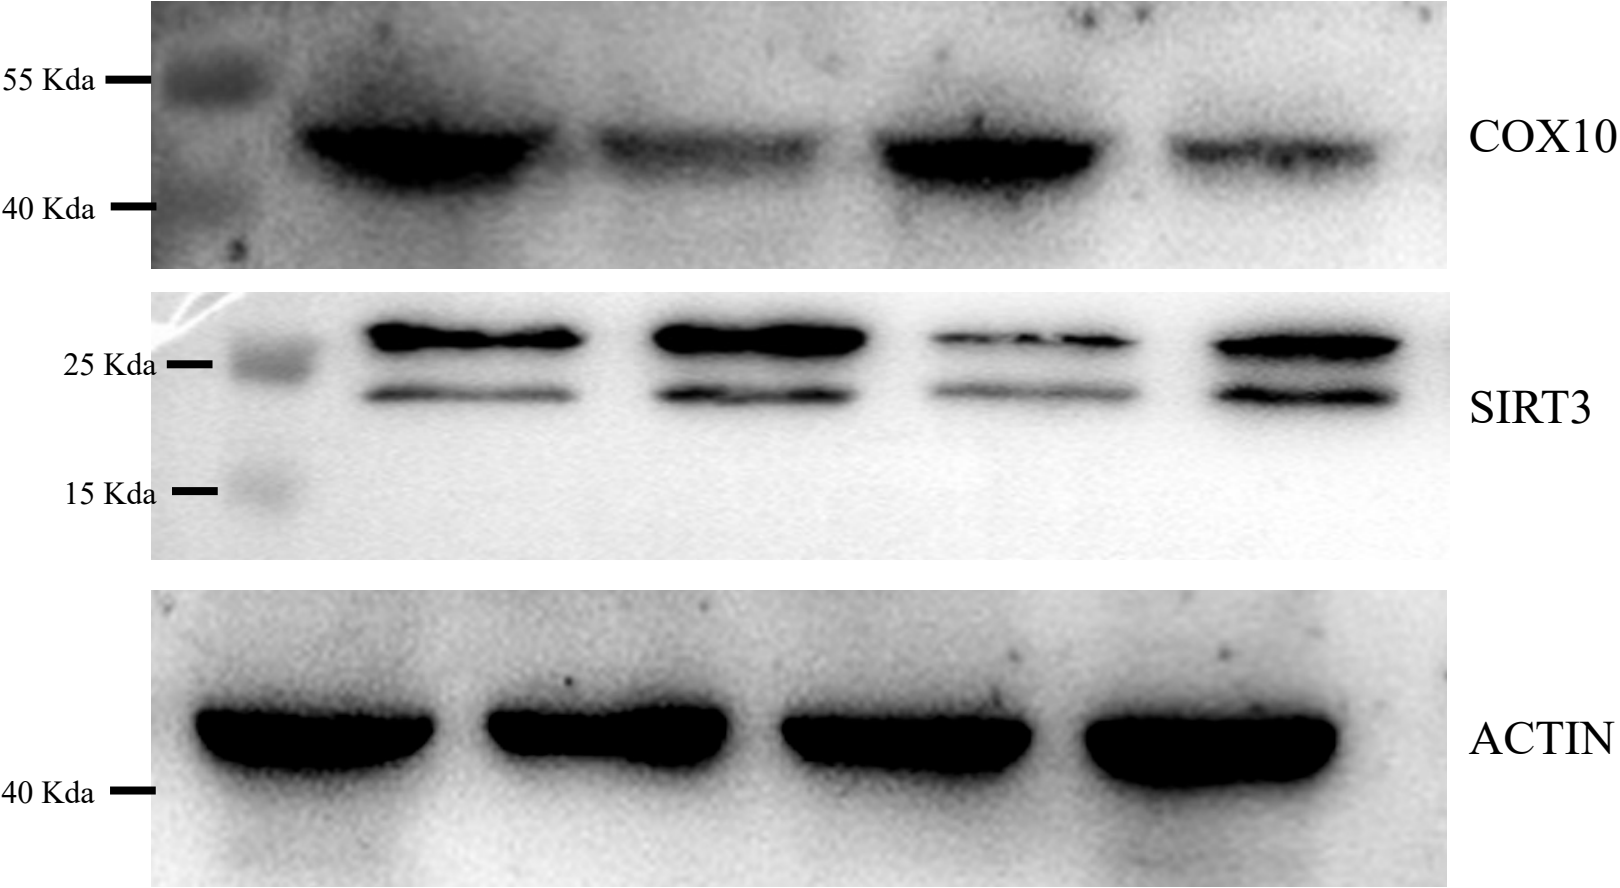

Supplementary Figure S7A-C

A

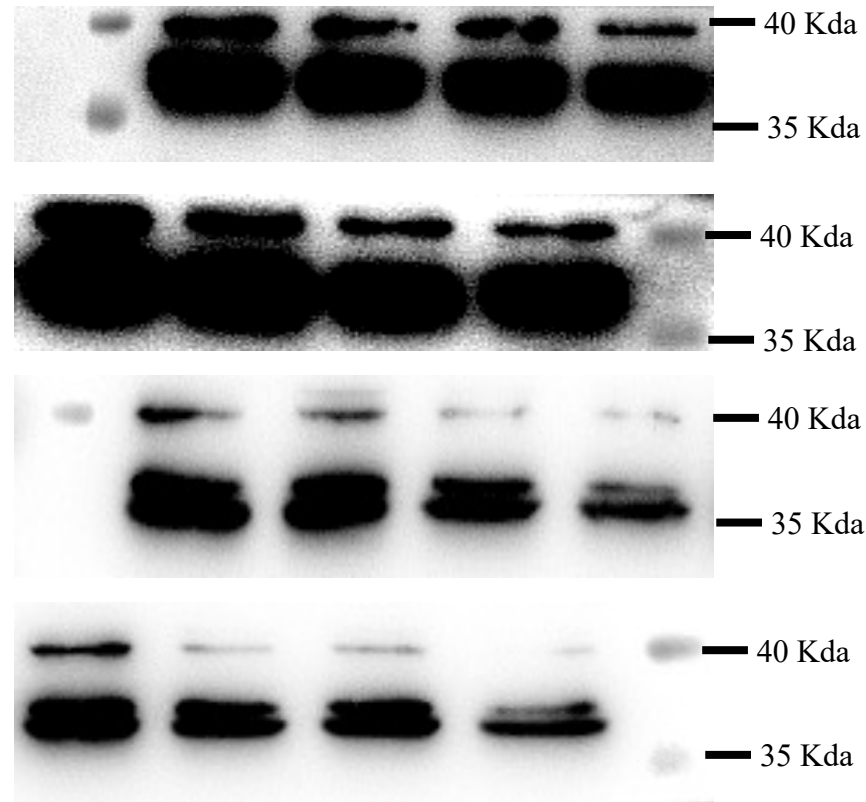

B

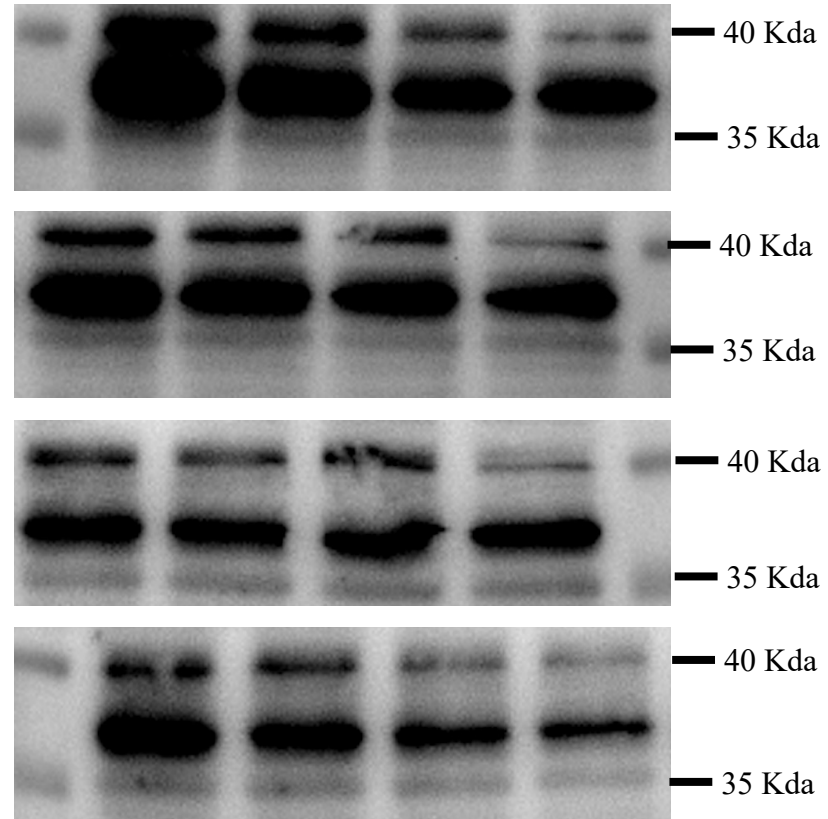

C

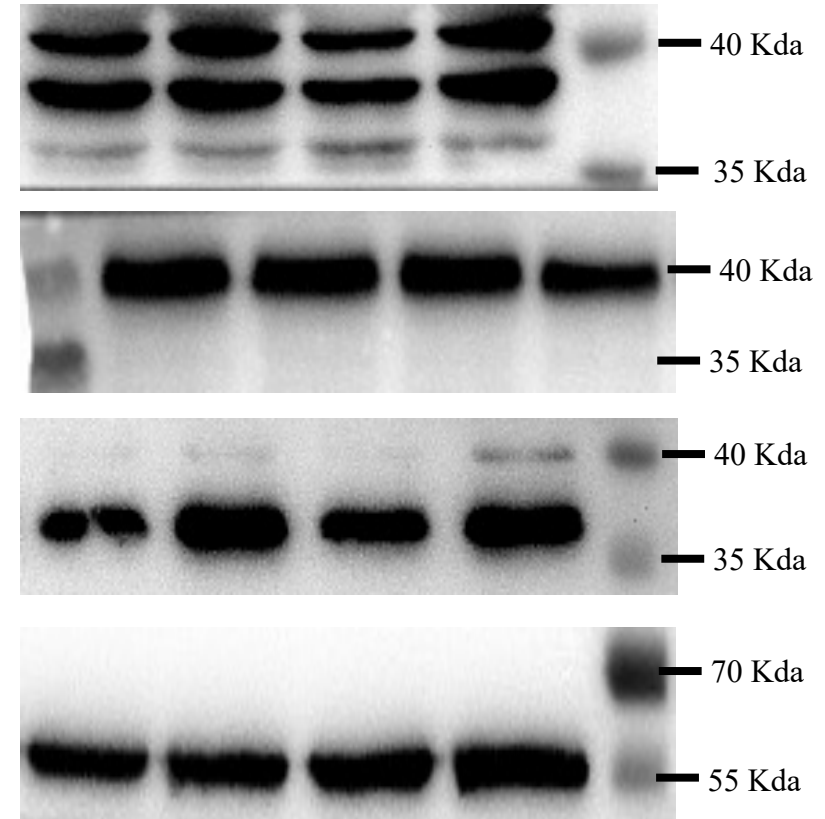

Supplementary Figure S7F-J

F

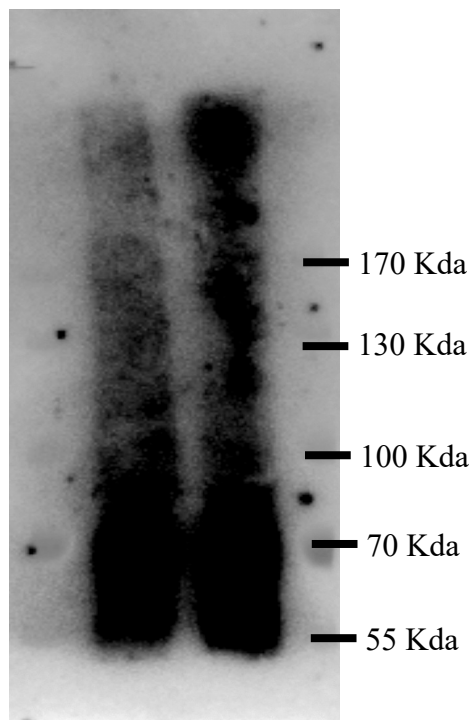

G

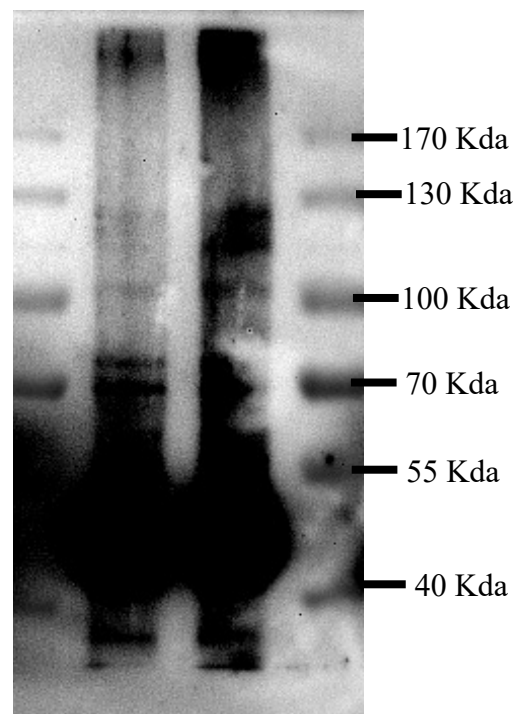

H

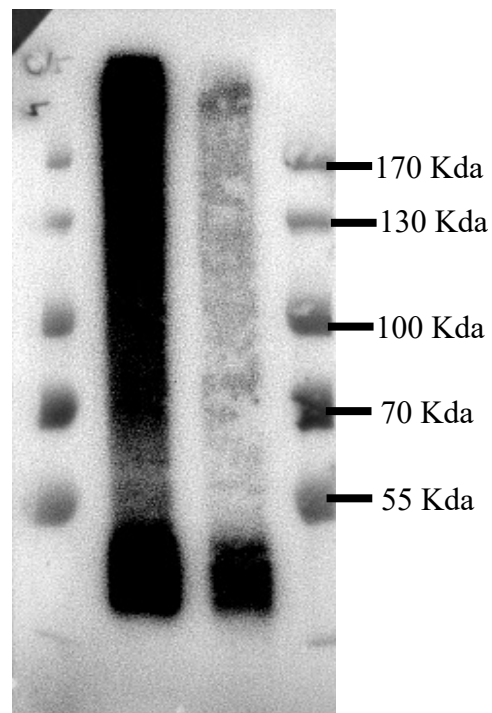

I

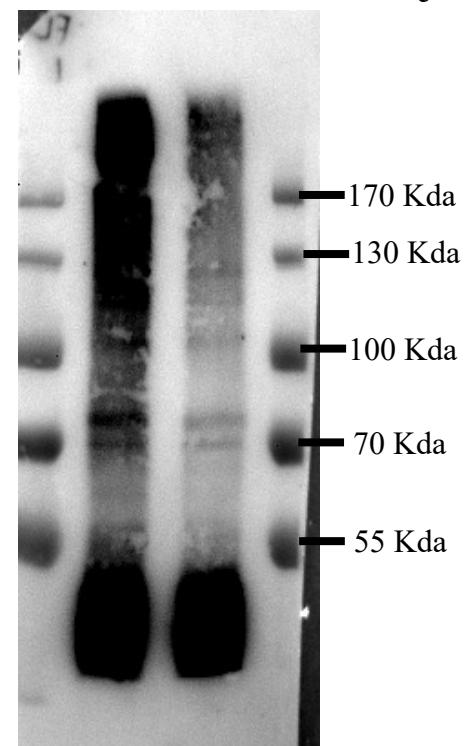

J

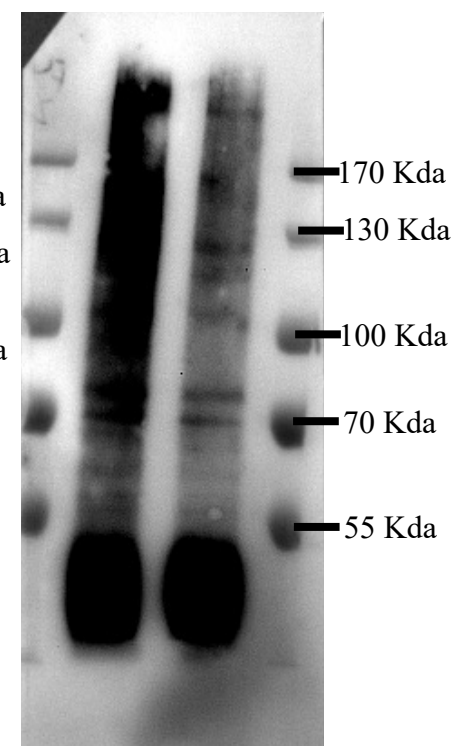

FLAG

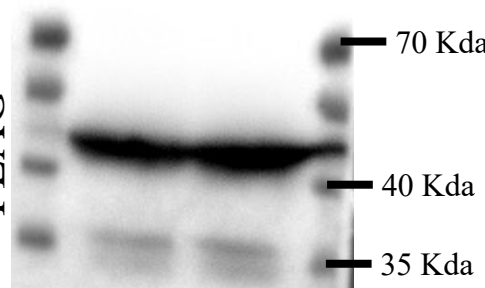

FLAG

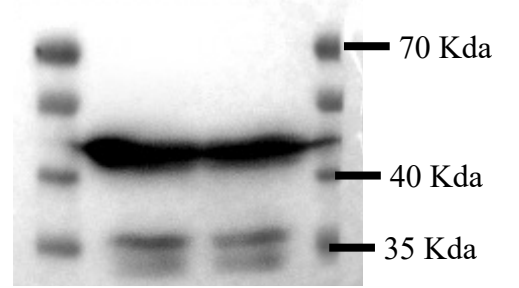

FLAG

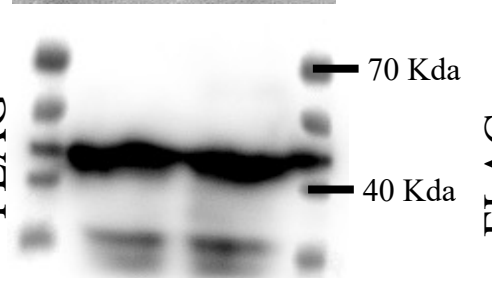

FLAG

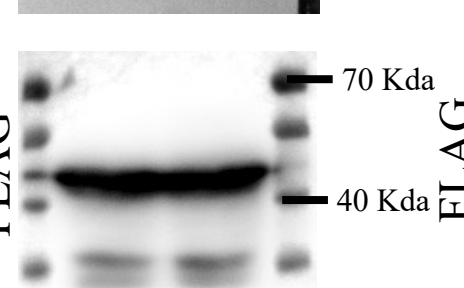

FLAG

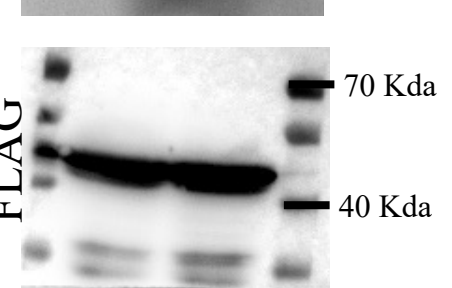

Gapdh

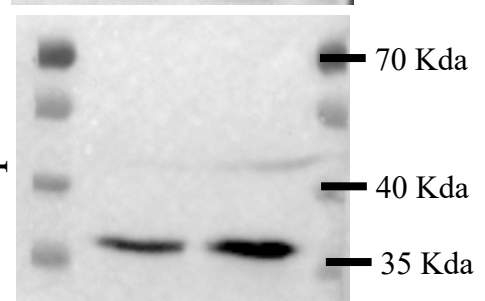

Gapdh

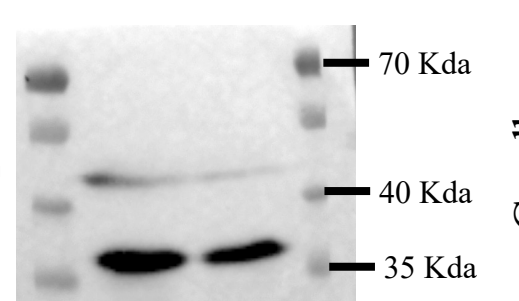

Gapdh

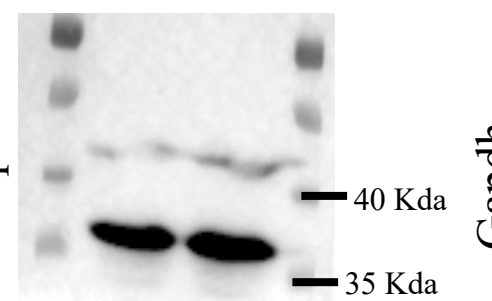

Gapdh

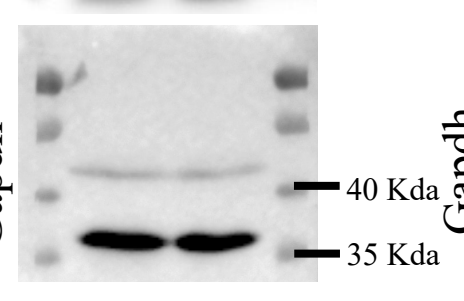

Gapdh

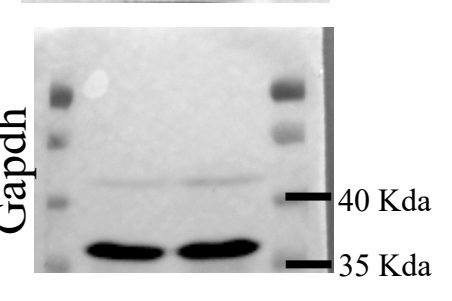

Supplementary Figure S10B

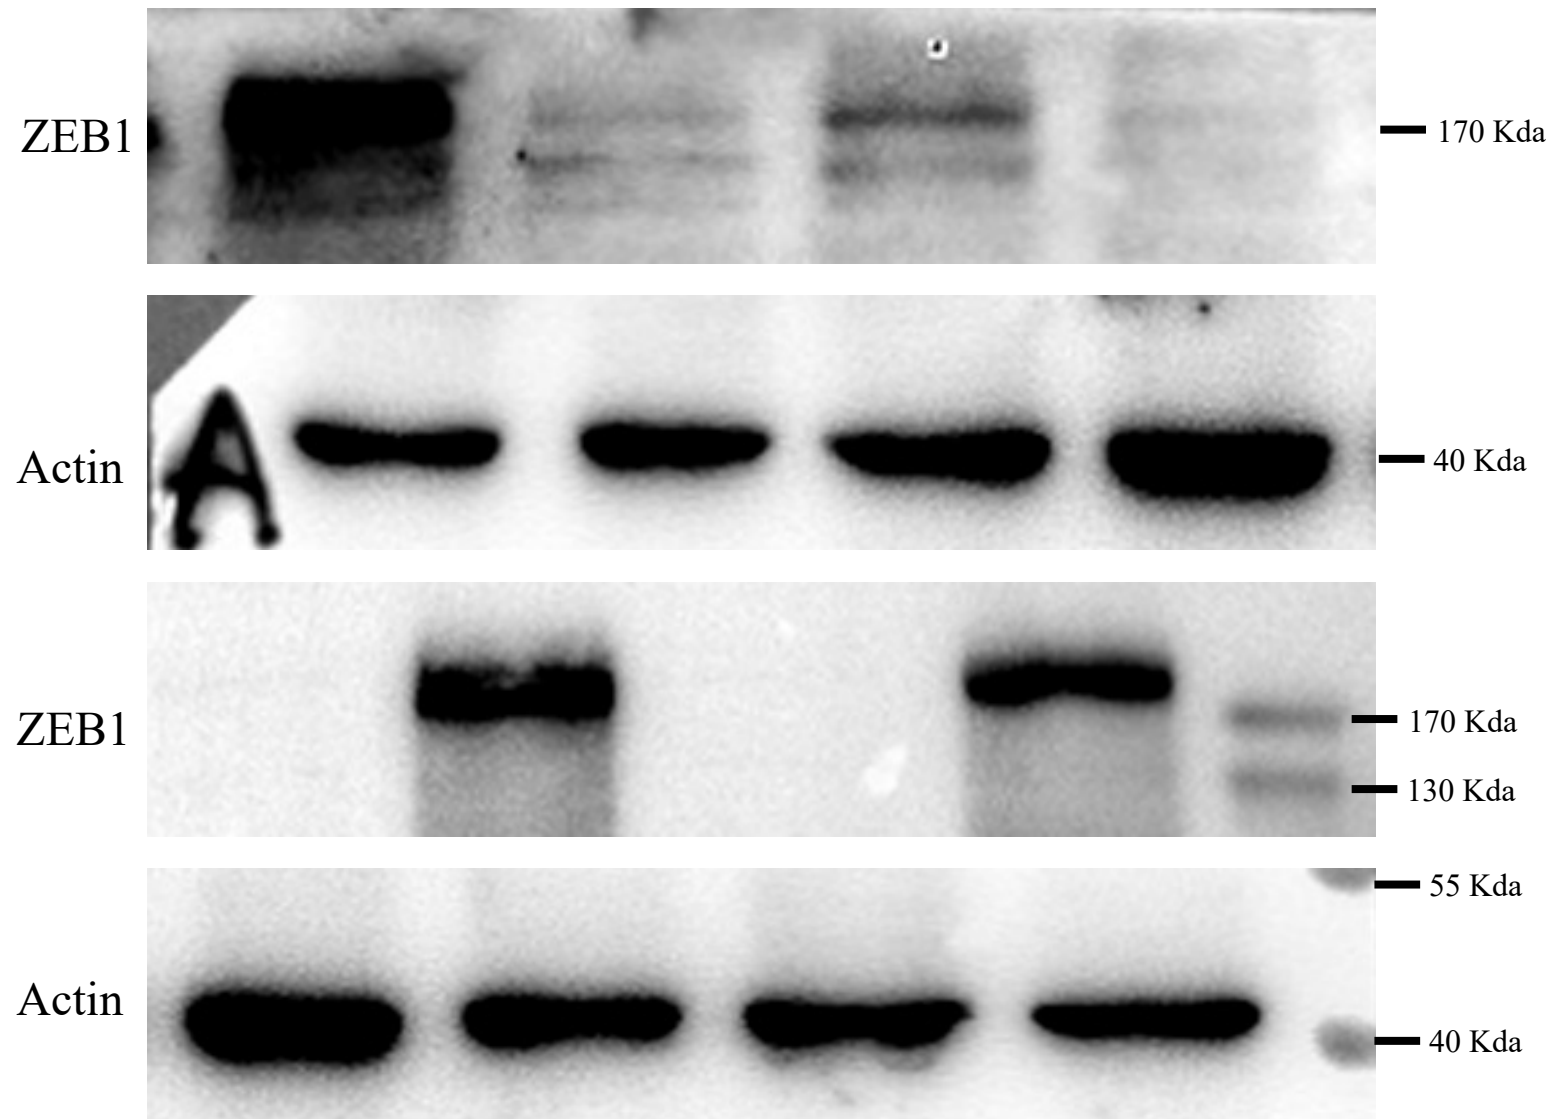

Supplementary Figure S11E

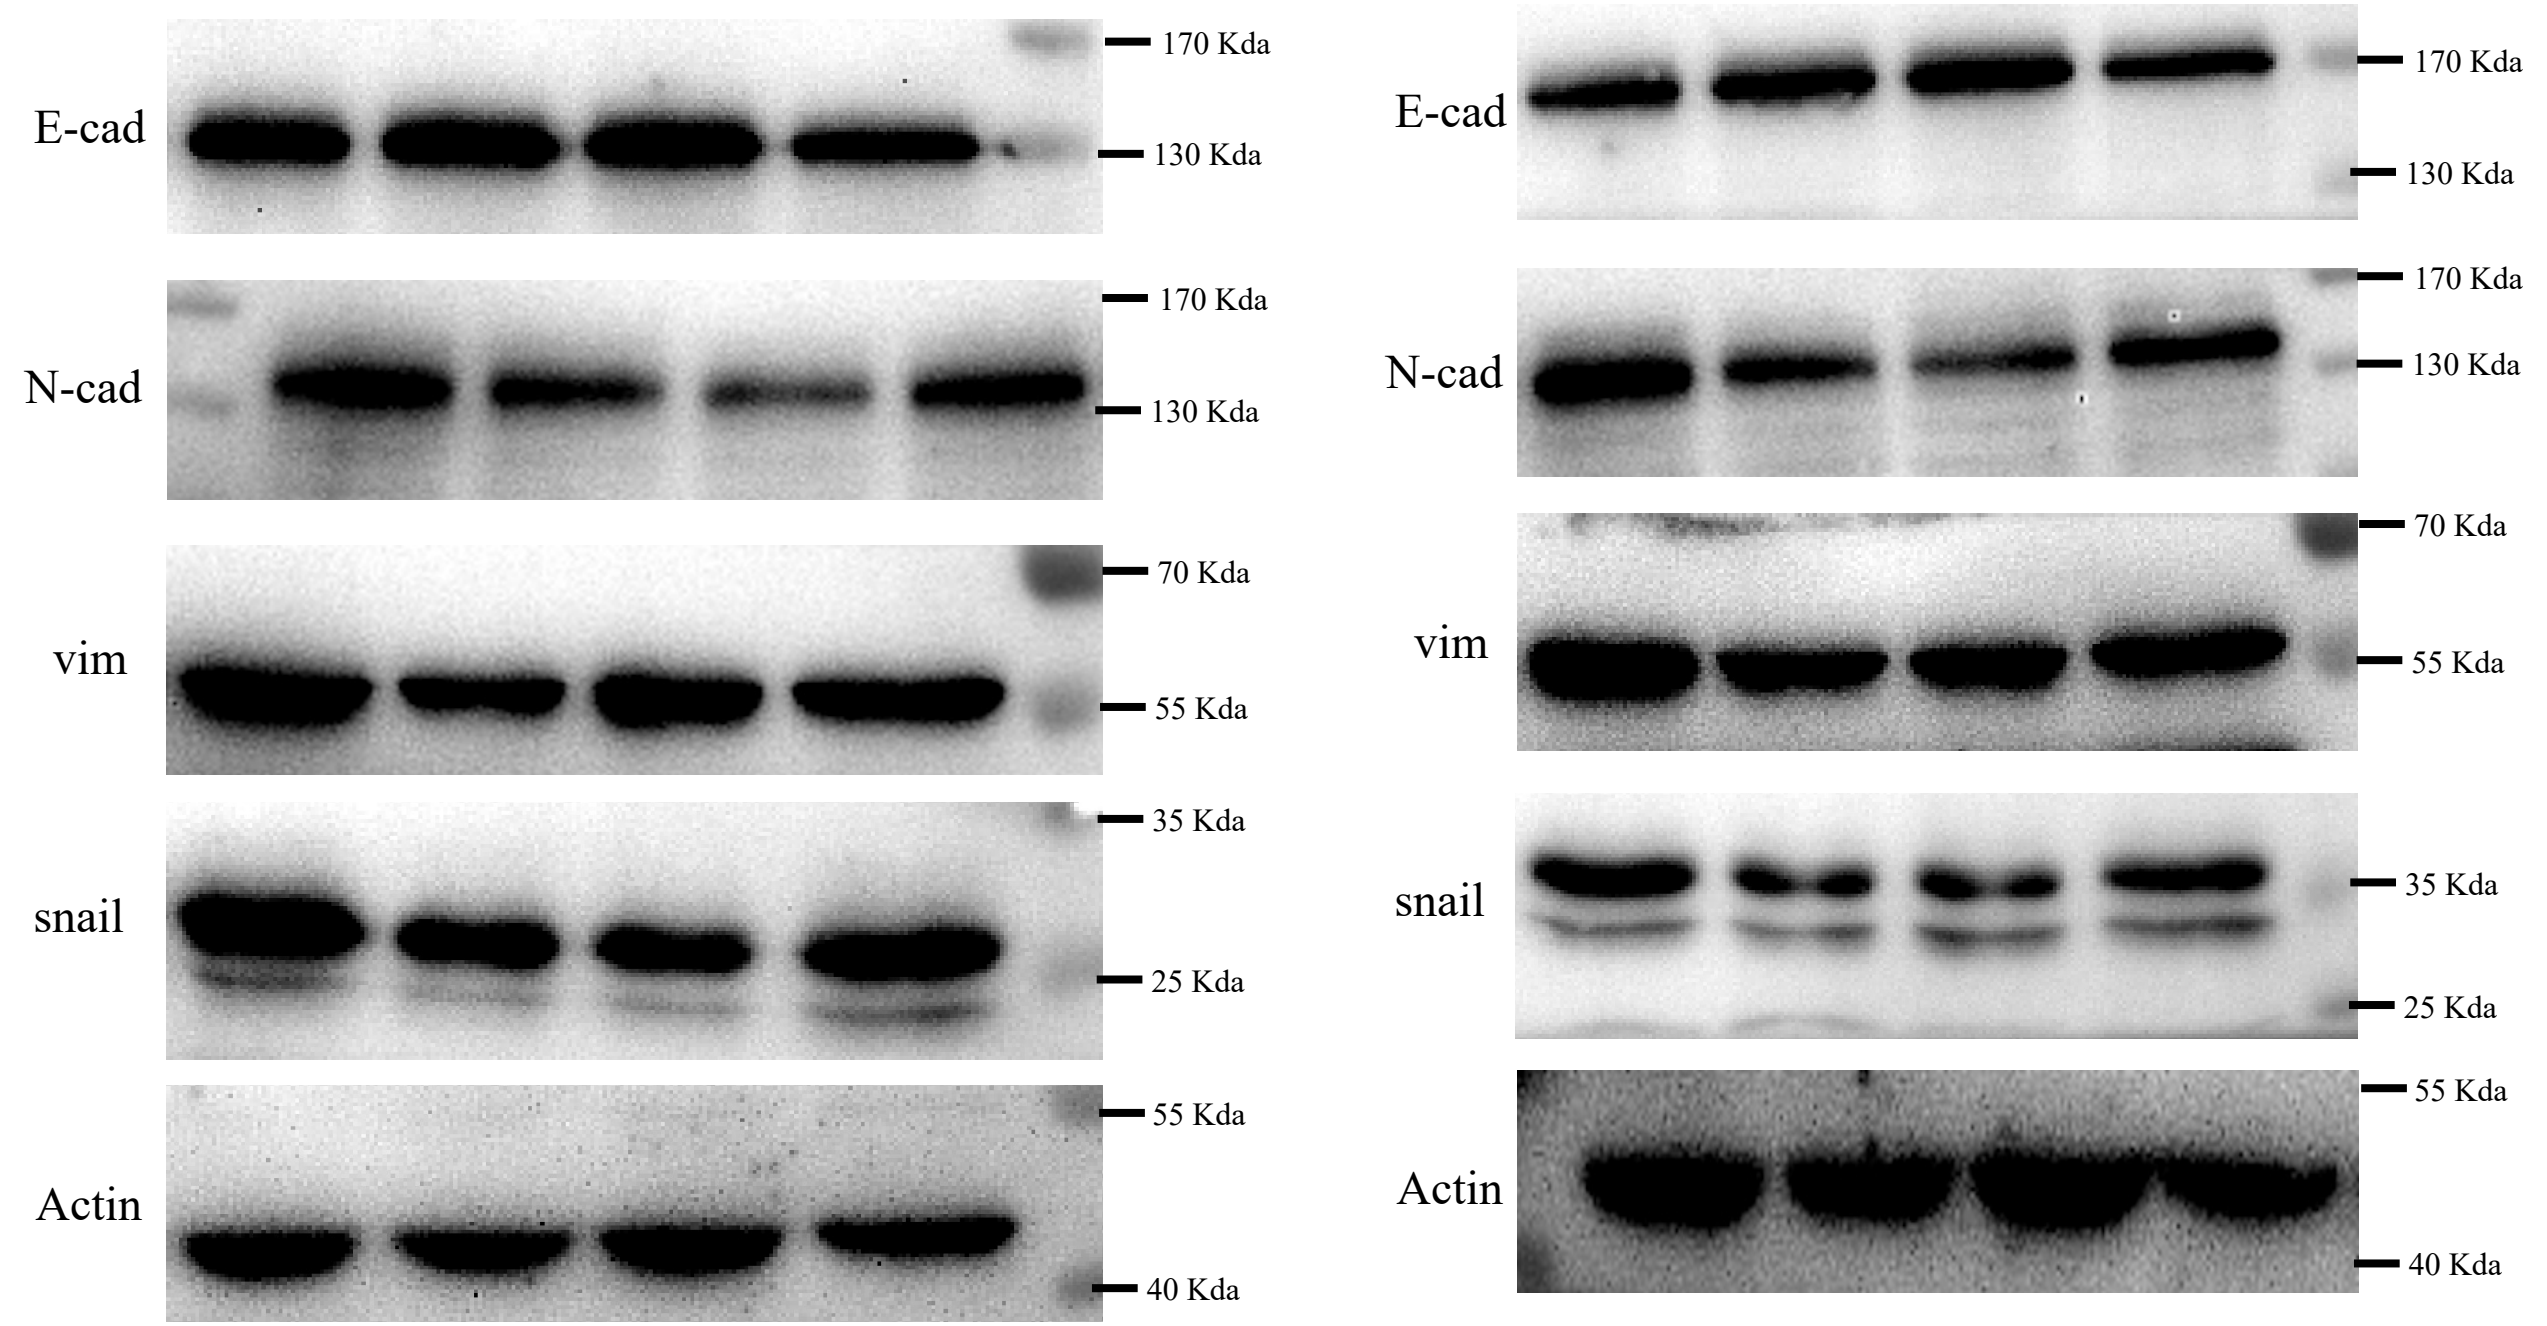

Supplementary Figure S11F

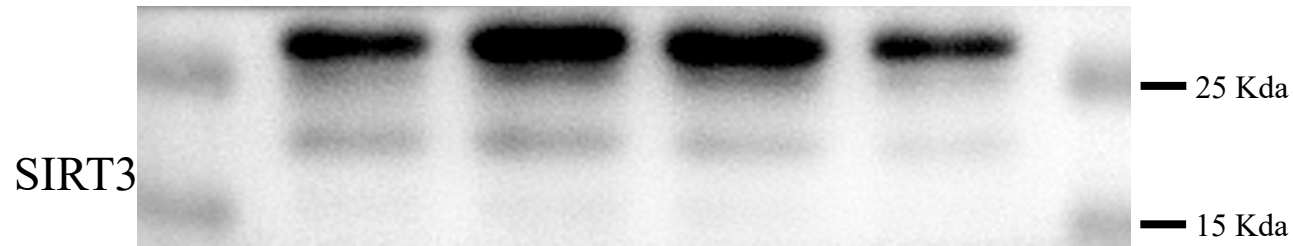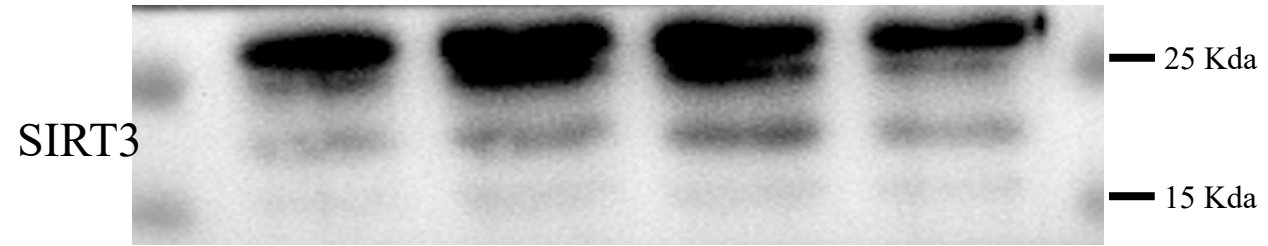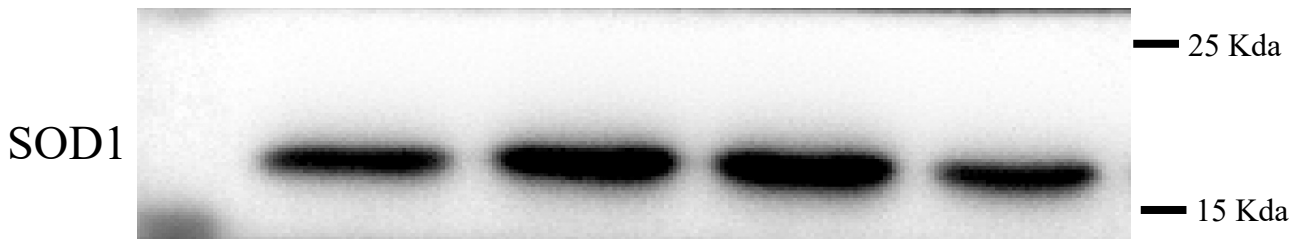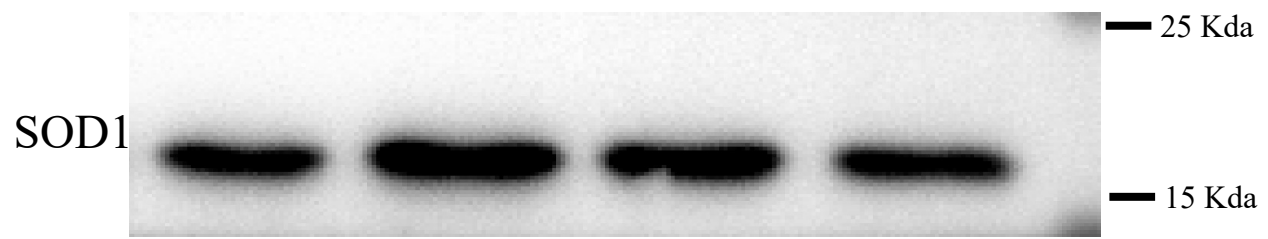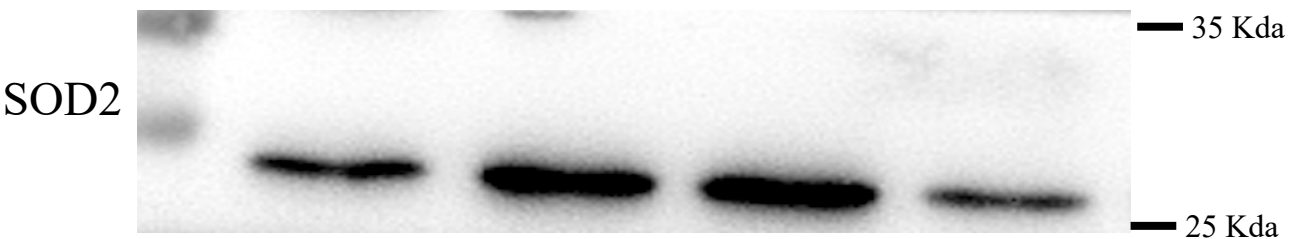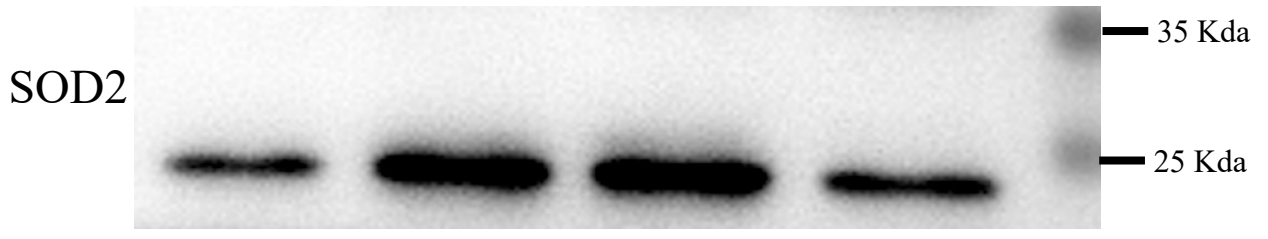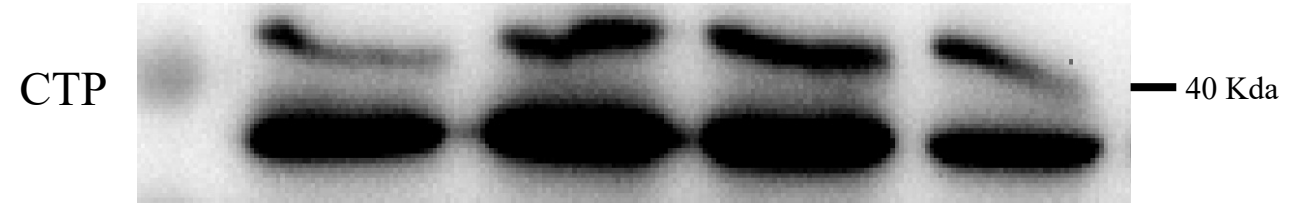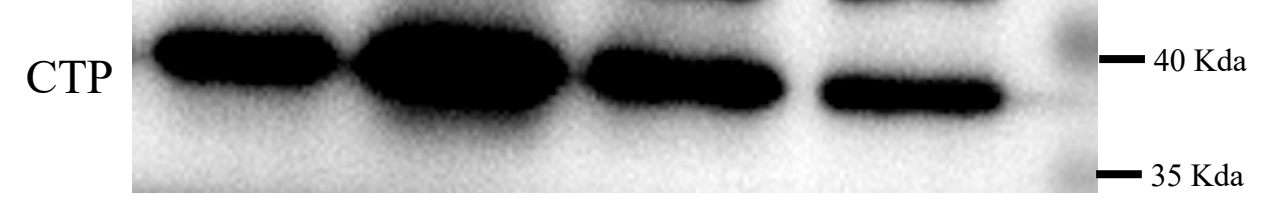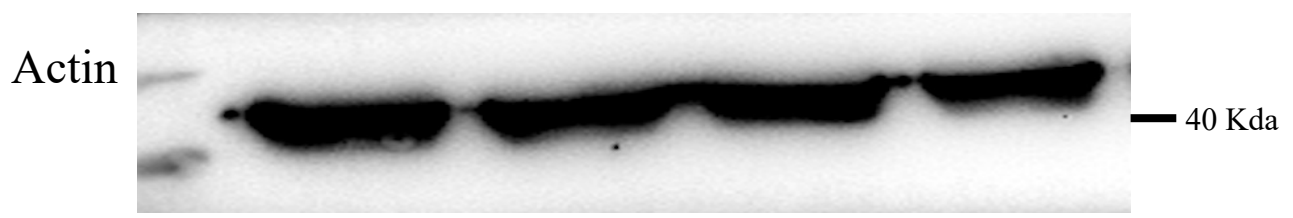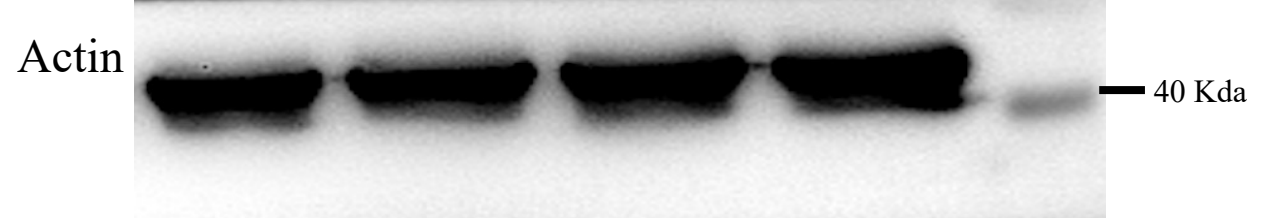

Supplement: 41419_2022_5157_MOESM22_ESM.pdf [file 41419_2022_5157_MOESM22_ESM.pdf]
